# Supplementary material for: Direct functionalization of quinoxalin-2(1H)-one with alkanes: C(sp2)–H/C(sp3)–H cross coupling in transition metal-free mode
Source: Royal Society of Chemistry journal article supplement (doi:10.1039/d1ob00665g), 2021-01-01

## Supporting Information

### **Oxidative Alkylation of Heterocycles: C(sp<sup>2</sup>)-H/C(sp<sup>3</sup>)-H Cross-Coupling in Transition Metal-Free Mode**

Swati Singh, Neha Dagar and Sudipta Raha Roy\*

Department of Chemistry, Indian Institute of Technology Delhi, Hauz Khas,  
New Delhi, 110016, India

Phone number: (+91) 11-2659-7954; e-mail address: [srr@chemistry.iitd.ac.in](mailto:srr@chemistry.iitd.ac.in)

## Table of Contents

| S. No. | Particulars                                                                         | Pages  |
|--------|-------------------------------------------------------------------------------------|--------|
| 1.     | Mechanistic Investigations                                                          | S3-S4  |
| 2.     | Copies of $^1\text{H}$ NMR and $^{13}\text{C}$ NMR spectra of synthesized compounds | S5-S42 |

## Mechanistic Investigations:

### 1. Reaction inhibition by BHT and TEMPO:

In a sealed reaction tube, reaction between quinoxaline-2-one (0.1 mmol) and cyclohexane (2.0 mmol, 20 eq) was set up using di-*tert*-butylperoxide (DTBP) (0.3 mmol, 3 eq), *butylated hydroxytoluene* (BHT) (0.3 mmol, 3eq) in DCE (0.5 mL). The reaction mixture was stirred at 130 °C (oil bath) for 4h. No desired product was formed and the quinoxaline-2-one was remained intact.

In a separate sealed reaction tube, reaction between quinoxaline-2-one (0.1 mmol) and cyclohexane (2.0 mmol, 20 eq) was set up using di-*tert*-butylperoxide (DTBP) (0.3 mmol, 3 eq), 2,2,6,6-tetramethyl-1-piperidinyloxy (TEMPO) (0.3 mmol, 3eq) in DCE (0.5 mL). The reaction mixture was stirred at 130 °C (oil bath) for 4h. An aliquot portion of the reaction mixture was subjected to mass spectrometry (HR-MS) to identify the reactive intermediate (Figure S1). In ESI we were able to detect cyclohexyl radical adduct with TEMPO.

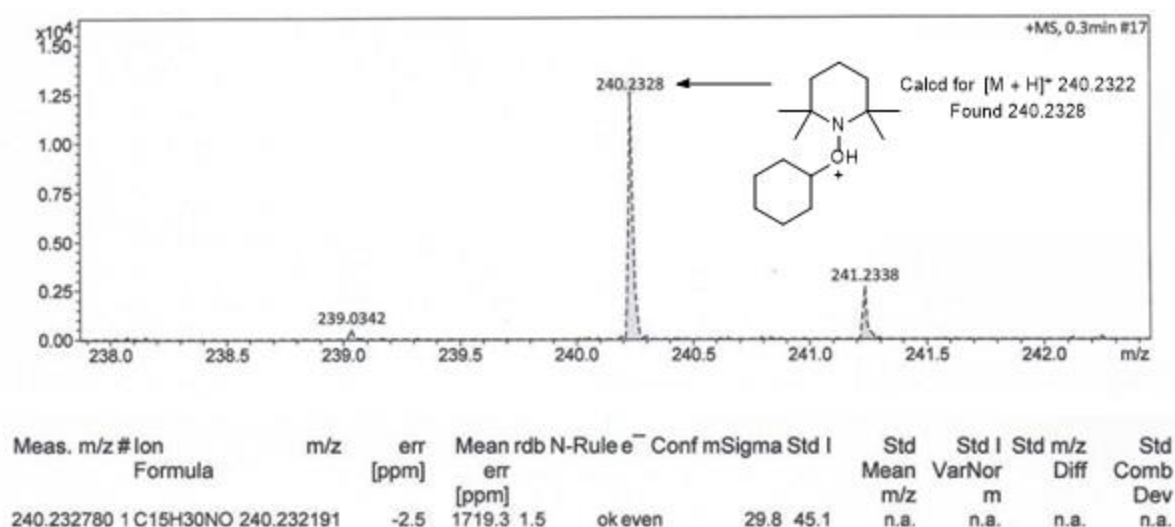

**Figure S1: HR-MS of radical quenching experiment with TEMPO**

### 2. Studies of reaction mechanism by gas chromatography (GC):

At first, authentic stander sample of *tert*-butanol (MS-a) and acetone (MS-b) was diluted with DCE and subjected to GC separately to know the retention time. Then, in a sealed reaction tube, reaction between quinoxaline-2-one (0.1 mmol) and cyclohexane (2.0 mmol, 20 eq) was set up using di-*tert*-butylperoxide (DTBP) (0.3 mmol, 3 eq) in DCE (0.5 mL). The reaction mixture was stirred at 130 °C (oil bath) for 4 h. The reaction mixture was cooled to room

temperature and from the reaction mixture 10  $\mu\text{L}$  aliquot was added to DCE (490  $\mu\text{L}$ ) to prepare the sample solution of crude reaction mixture for GC. From this sample solution 1  $\mu\text{L}$  aliquot was injected to the GC instrument (Shimadzu, Nexis GC-2030) and retention time was recorded (MS-c). After comparing the retention time with MS-a (1.810 min) and MS-b (1.955 min), we concluded that both acetone and *tert*-butanol was formed during the course of the reaction.

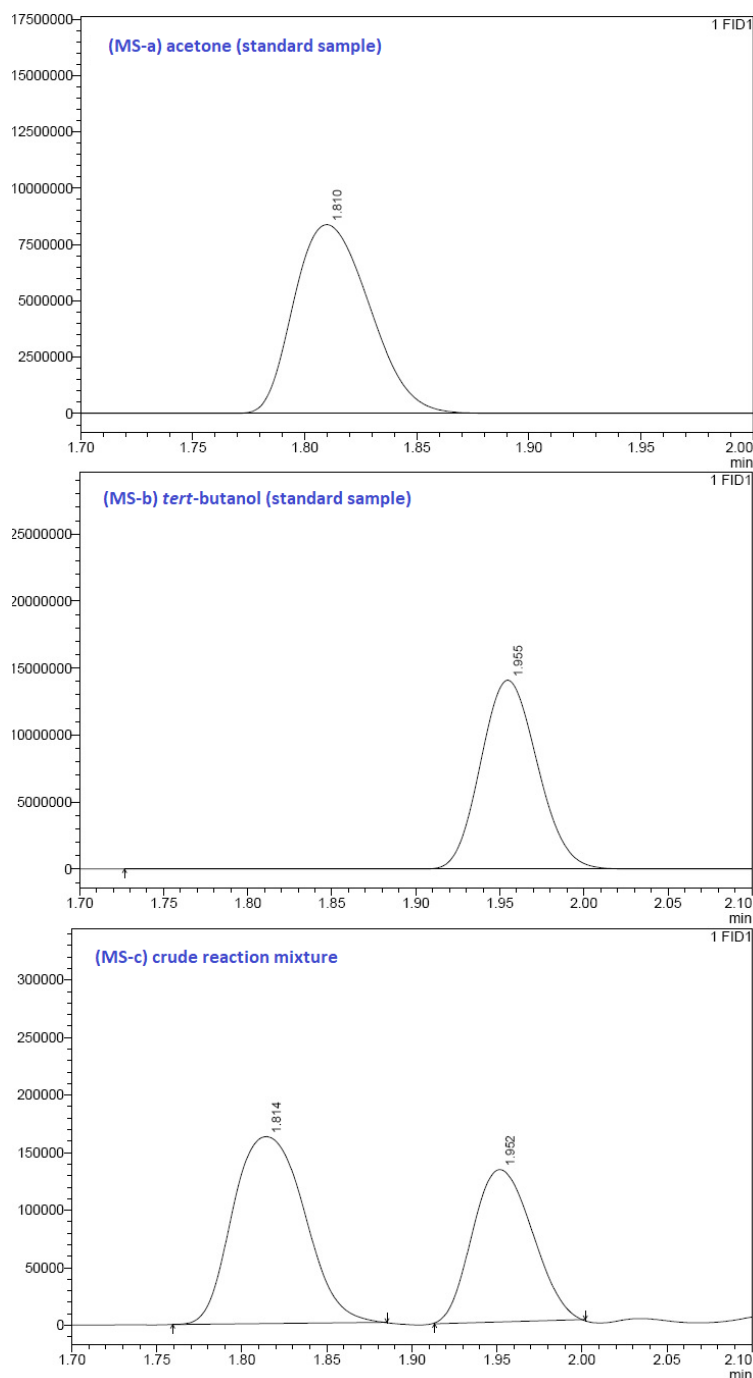

**Figure S2: Identification of acetone and *tert*-butanol during the course of the reaction through GC**

**<sup>1</sup>H NMR spectrum of 3a (500 MHz, DMSO-d<sub>6</sub>):**

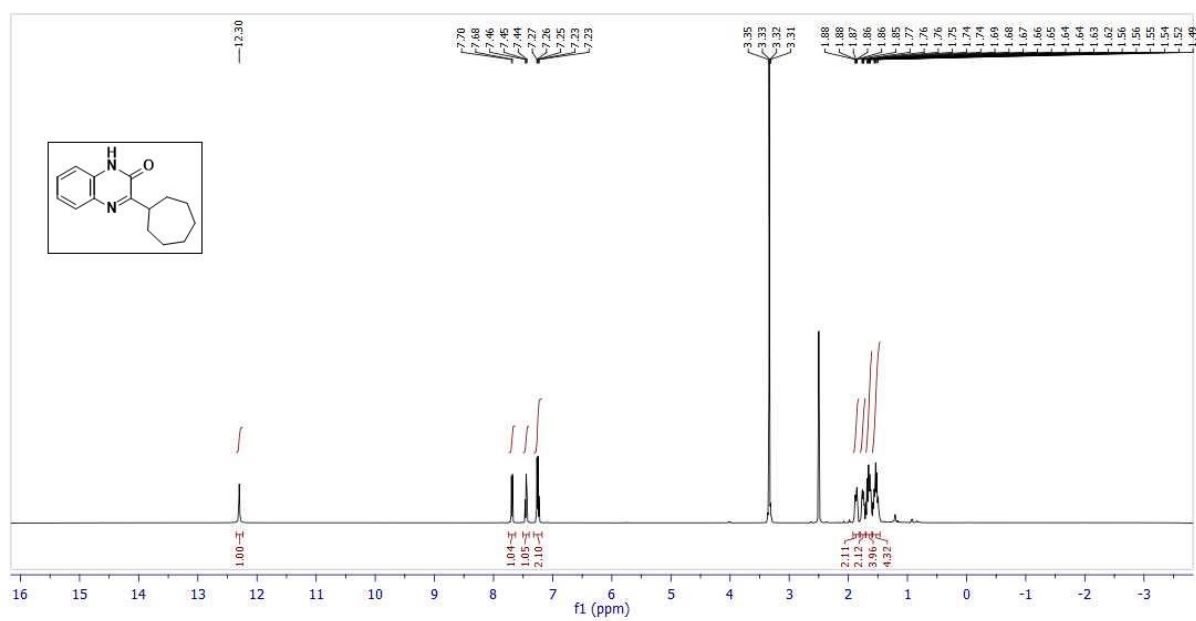

**<sup>13</sup>C NMR spectrum of 3a (126 MHz, DMSO-d<sub>6</sub>):**

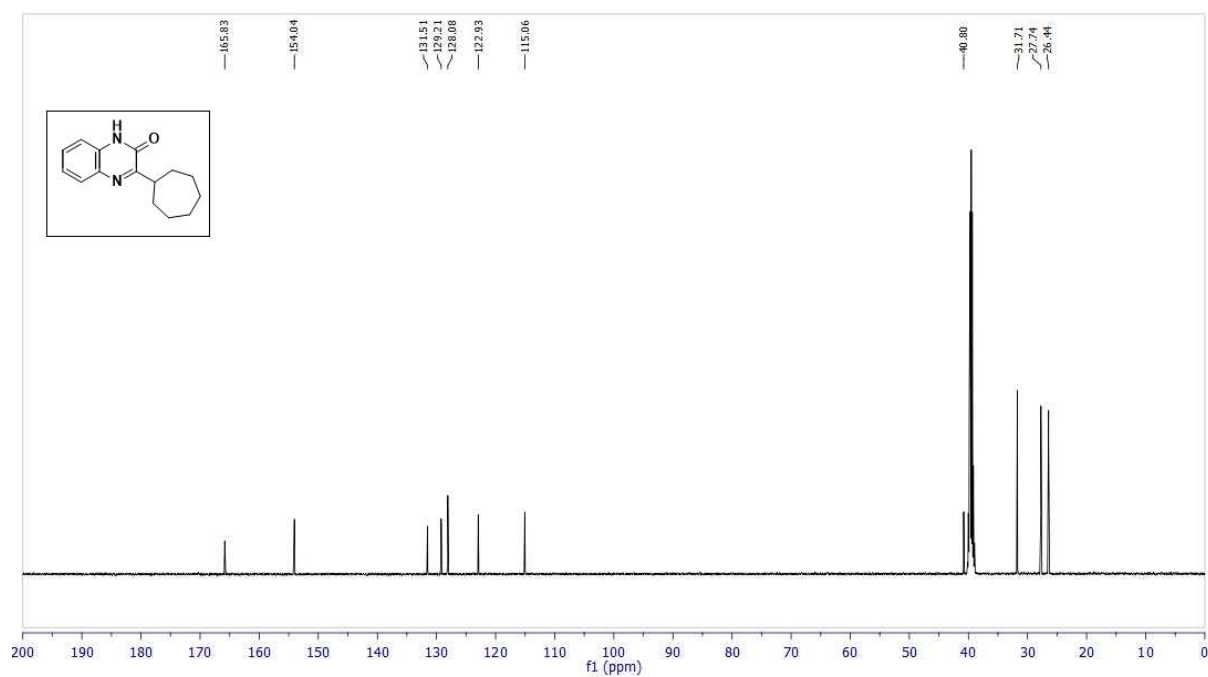

**<sup>1</sup>H NMR spectrum of 3b (500 MHz, DMSO-d<sub>6</sub>):**

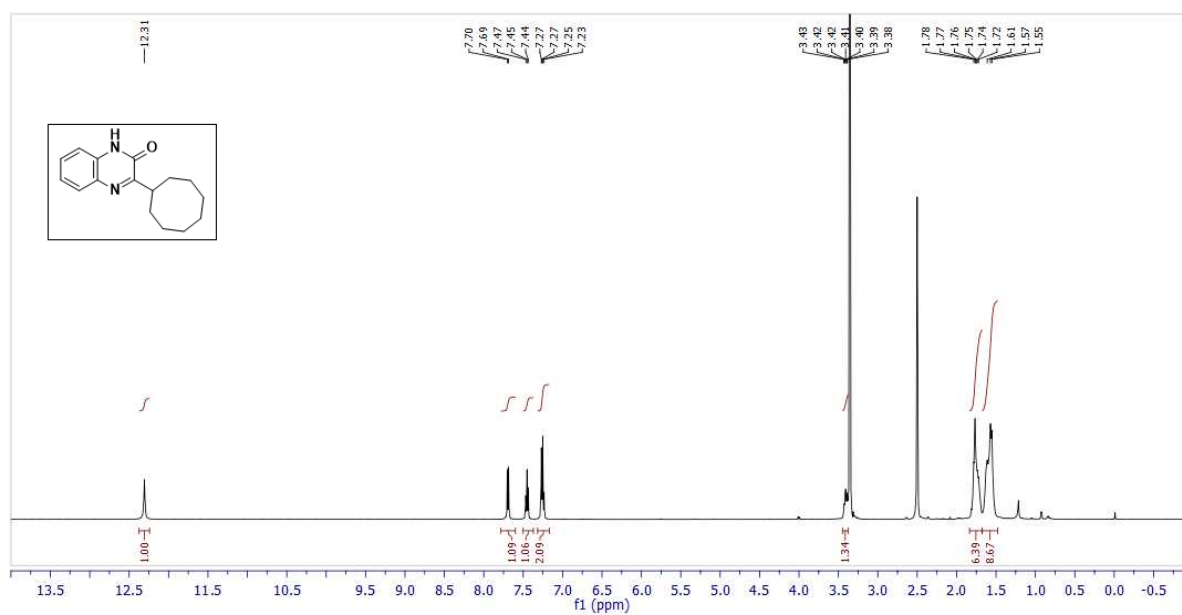

**<sup>13</sup>C NMR spectrum of 3b (126 MHz, DMSO-d<sub>6</sub>):**

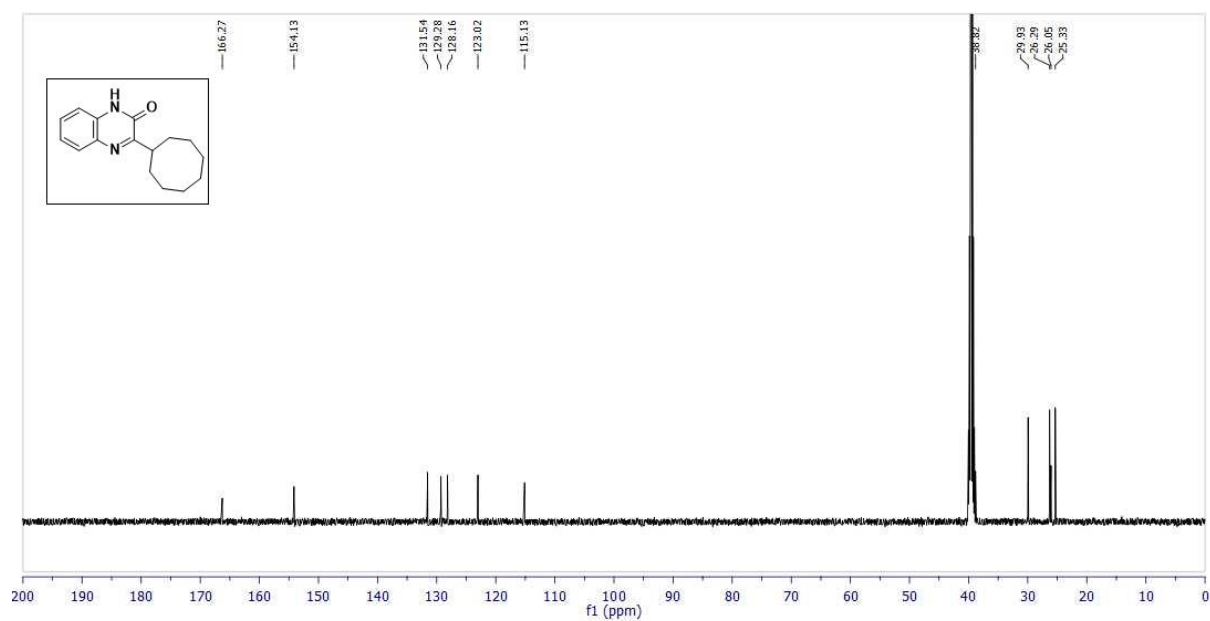

**<sup>1</sup>H NMR spectrum of 3c (500 MHz, DMSO-d<sub>6</sub>):**

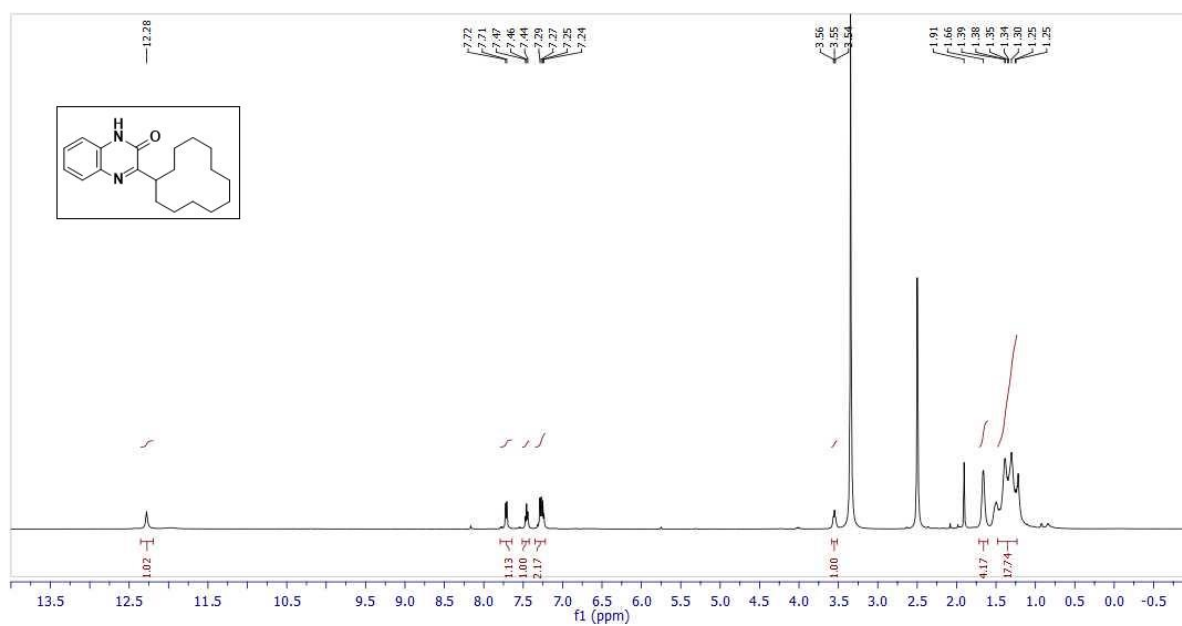

**<sup>13</sup>C NMR spectrum of 3c (126 MHz, DMSO-d<sub>6</sub>):**

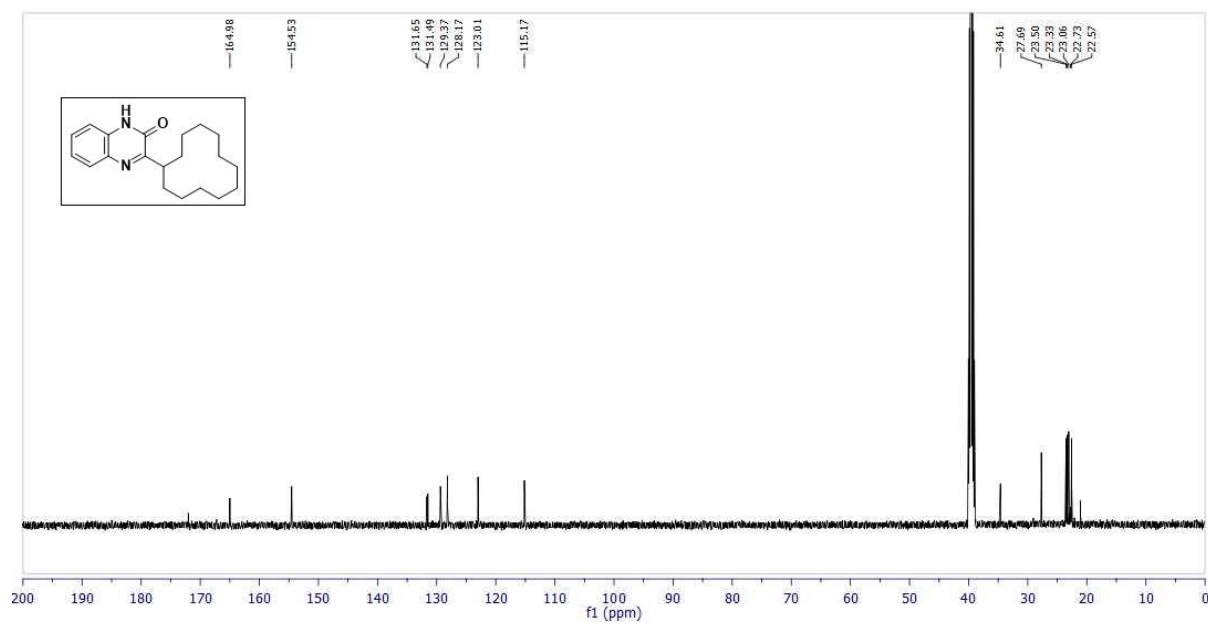

**<sup>1</sup>H NMR spectrum of 3d (500 MHz, DMSO-d<sub>6</sub>):**

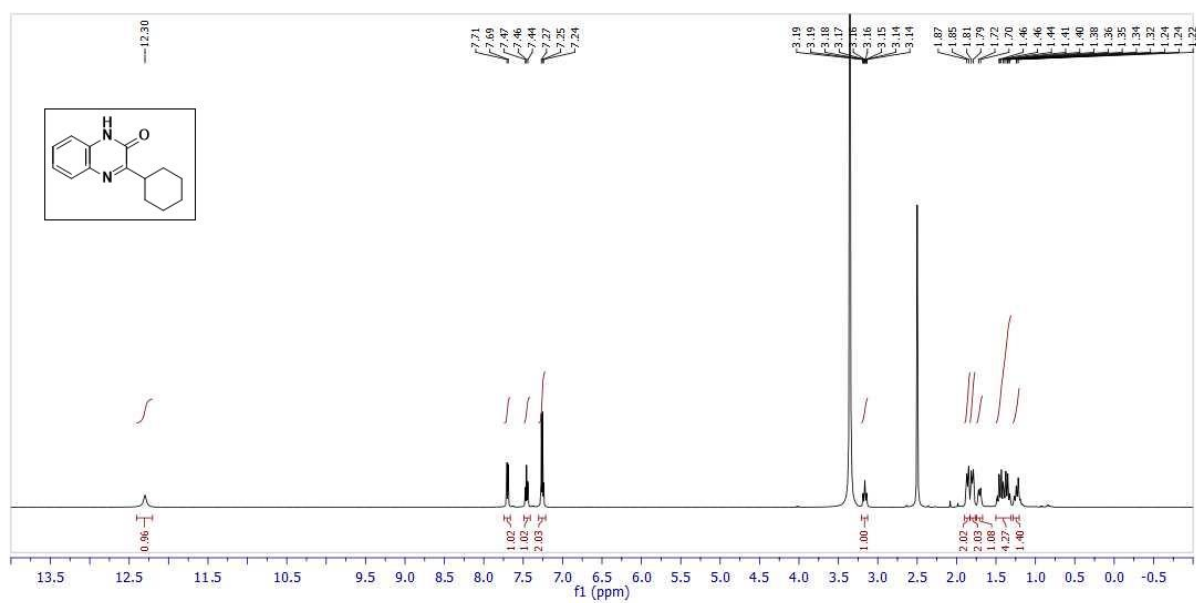

**<sup>13</sup>C NMR spectrum of 3d (126 MHz, DMSO-d<sub>6</sub>):**

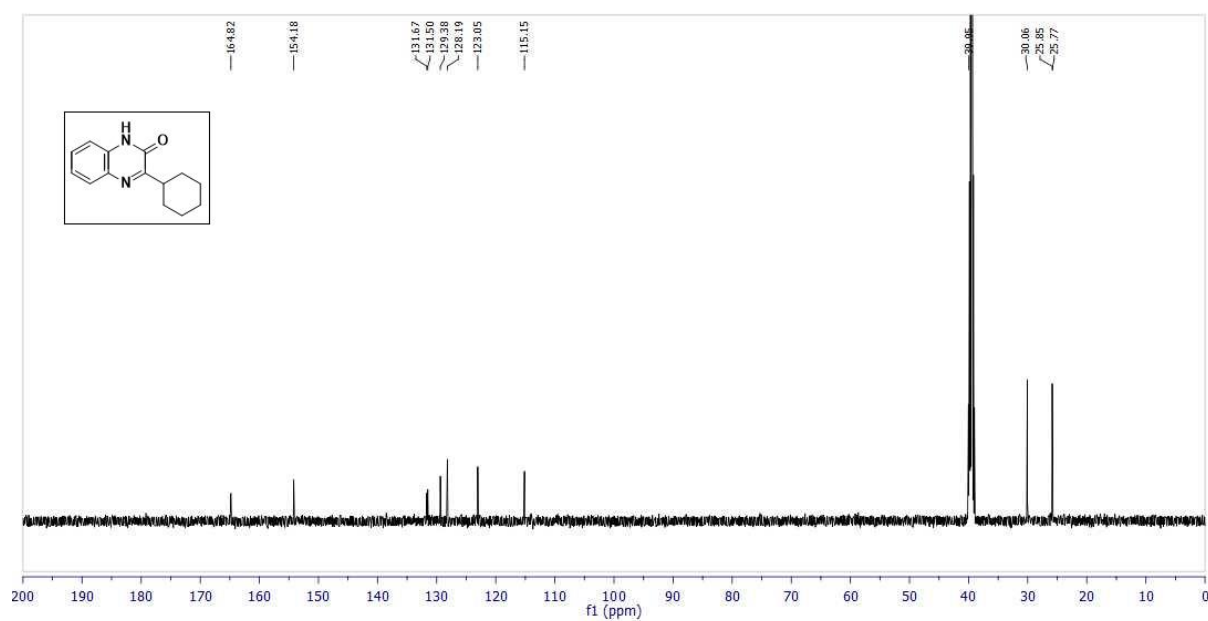

**$^1\text{H}$  NMR spectrum of 3e (500 MHz, DMSO- $d_6$ ):**

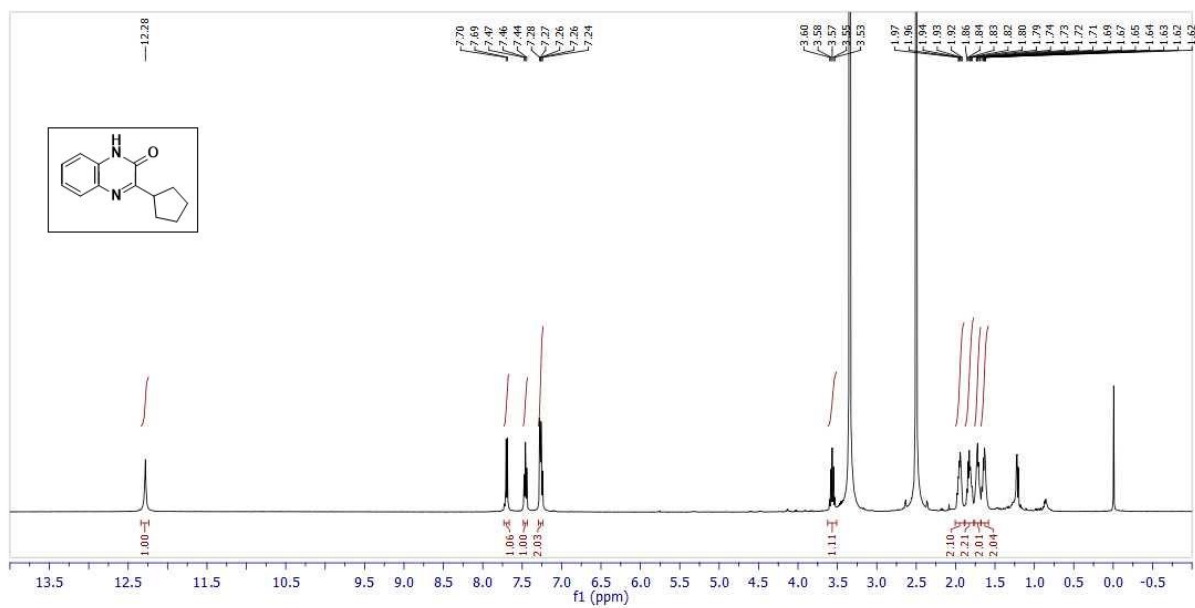

**$^{13}\text{C}$  NMR spectrum of 3e (101 MHz, DMSO- $d_6$ ):**

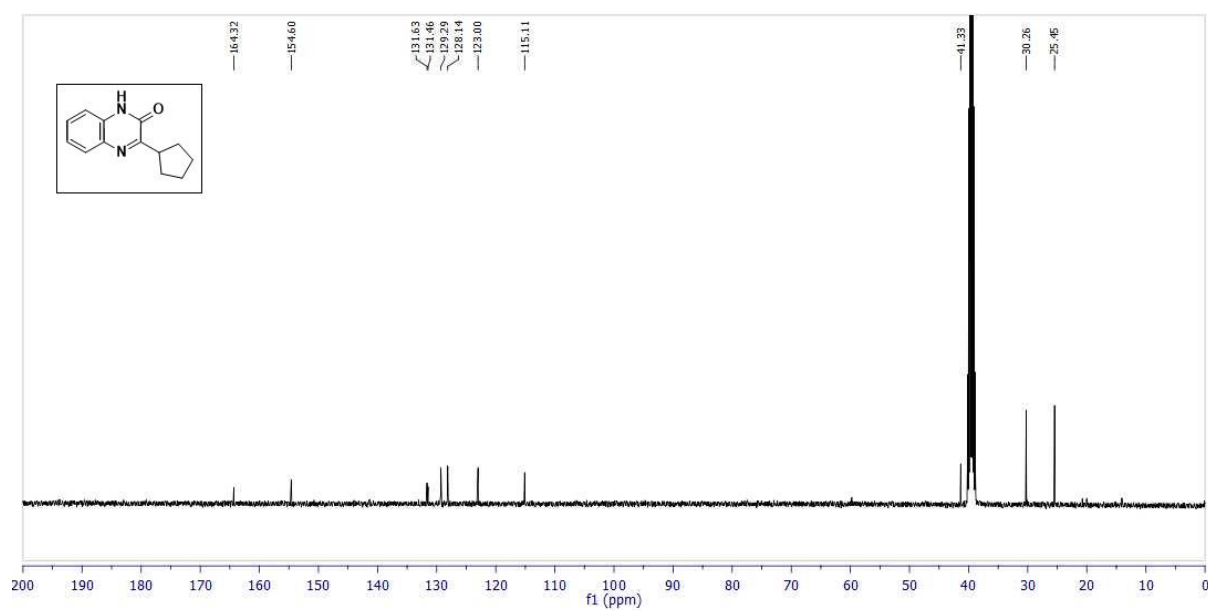

**<sup>1</sup>H NMR spectrum of 3f (500 MHz, CDCl<sub>3</sub>):**

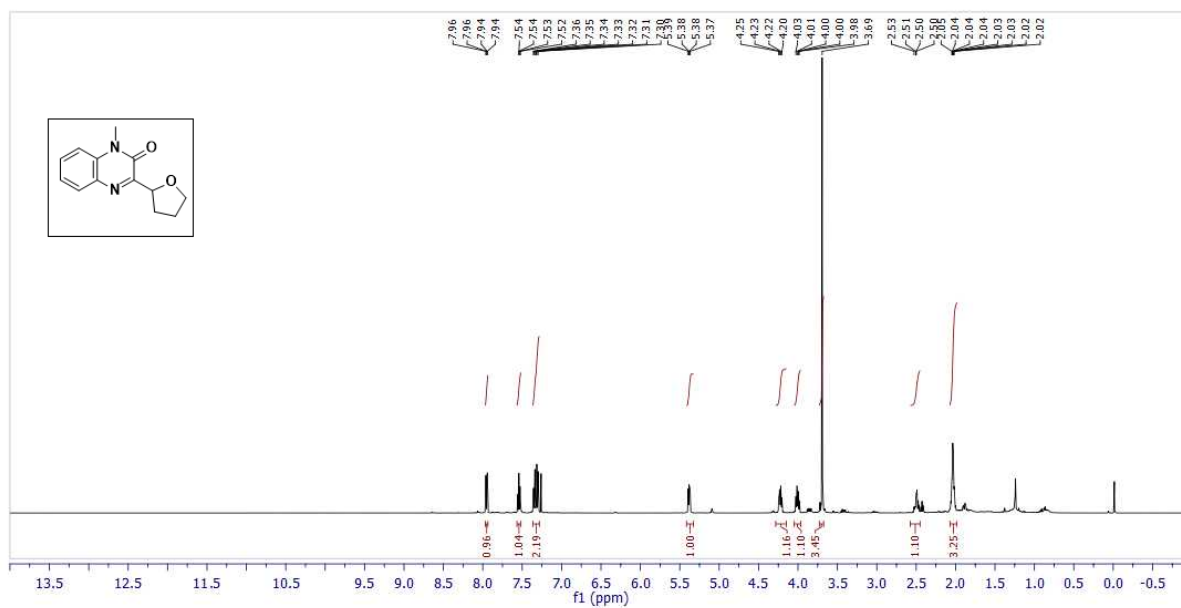

**<sup>13</sup>C NMR spectrum of 3f (126 MHz, CDCl<sub>3</sub>):**

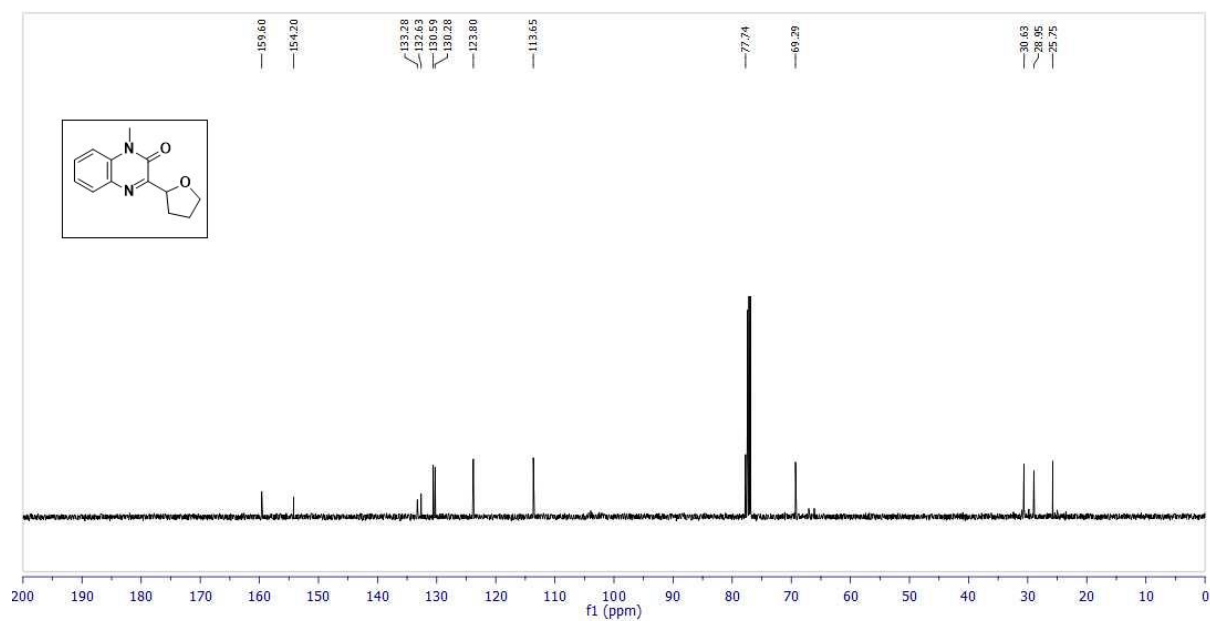

**<sup>1</sup>H NMR spectrum of 3g (500 MHz, CDCl<sub>3</sub>):**

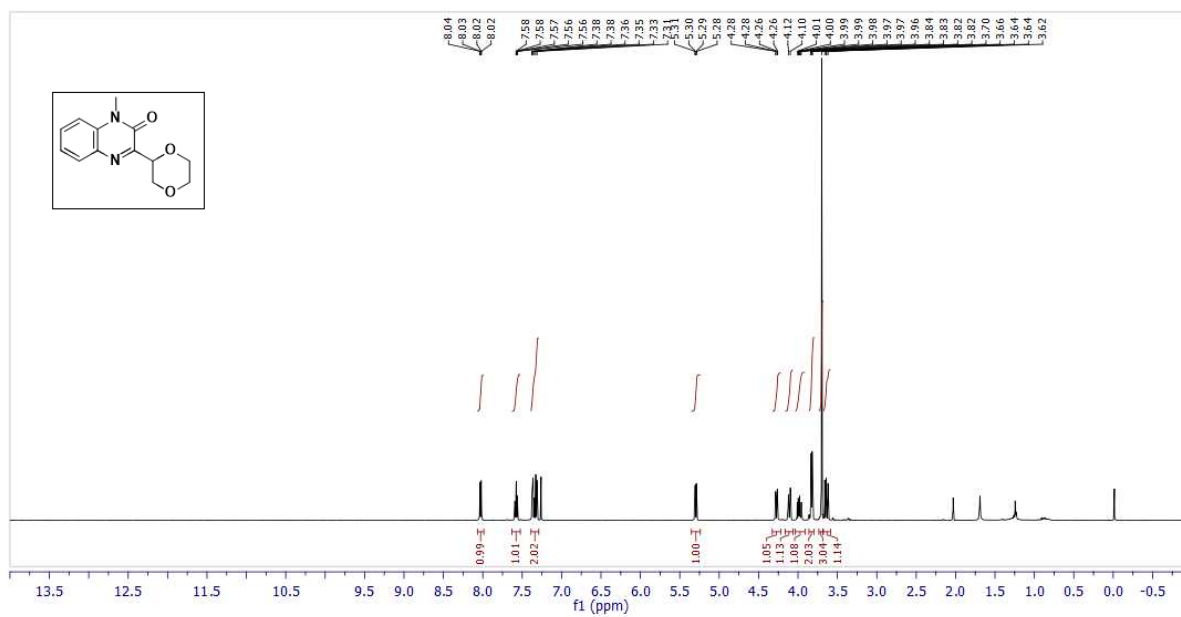

**<sup>13</sup>C NMR spectrum of 3g (101 MHz, CDCl<sub>3</sub>):**

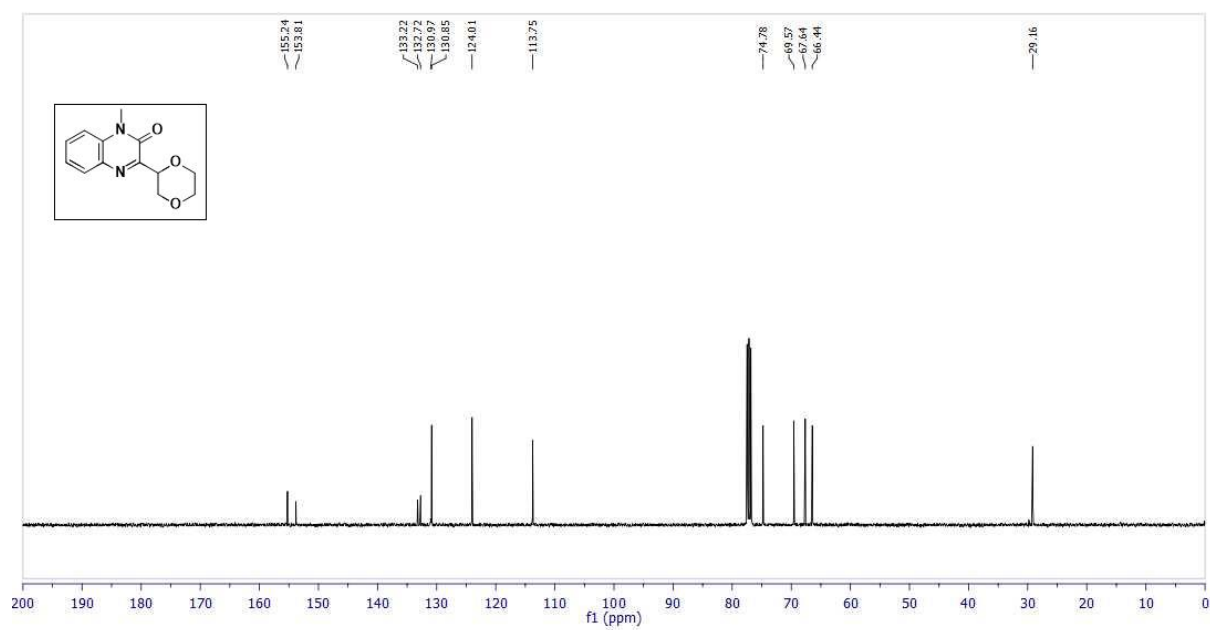

**<sup>1</sup>H NMR spectrum of 3h (500 MHz, DMSO-d<sub>6</sub>):**

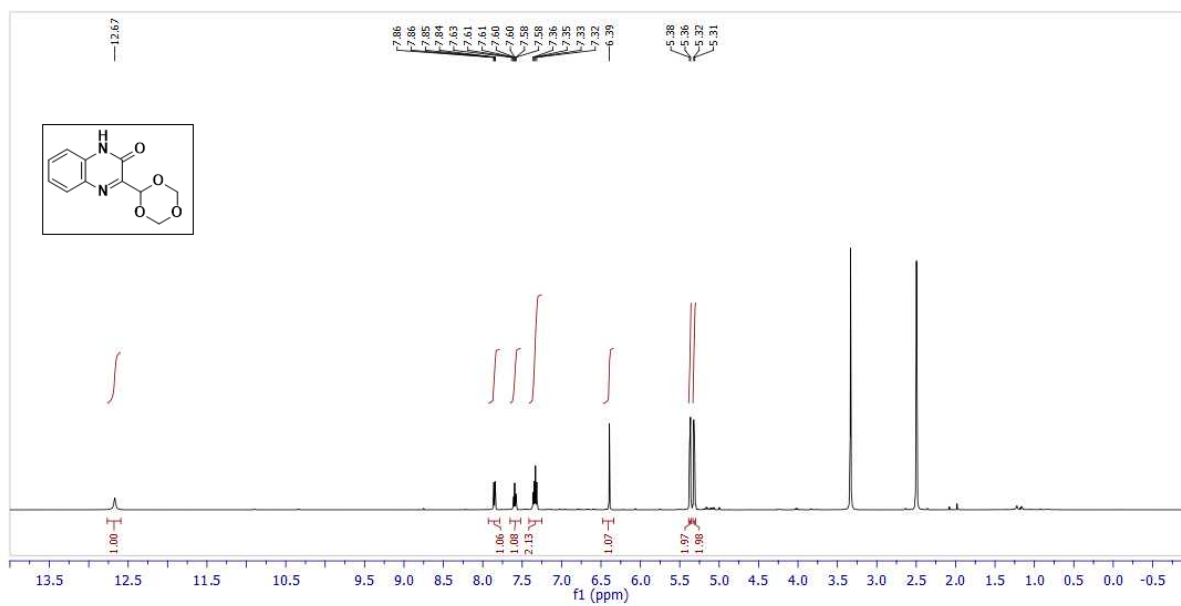

**<sup>13</sup>C NMR spectrum of 3h (126 MHz, DMSO-d<sub>6</sub>):**

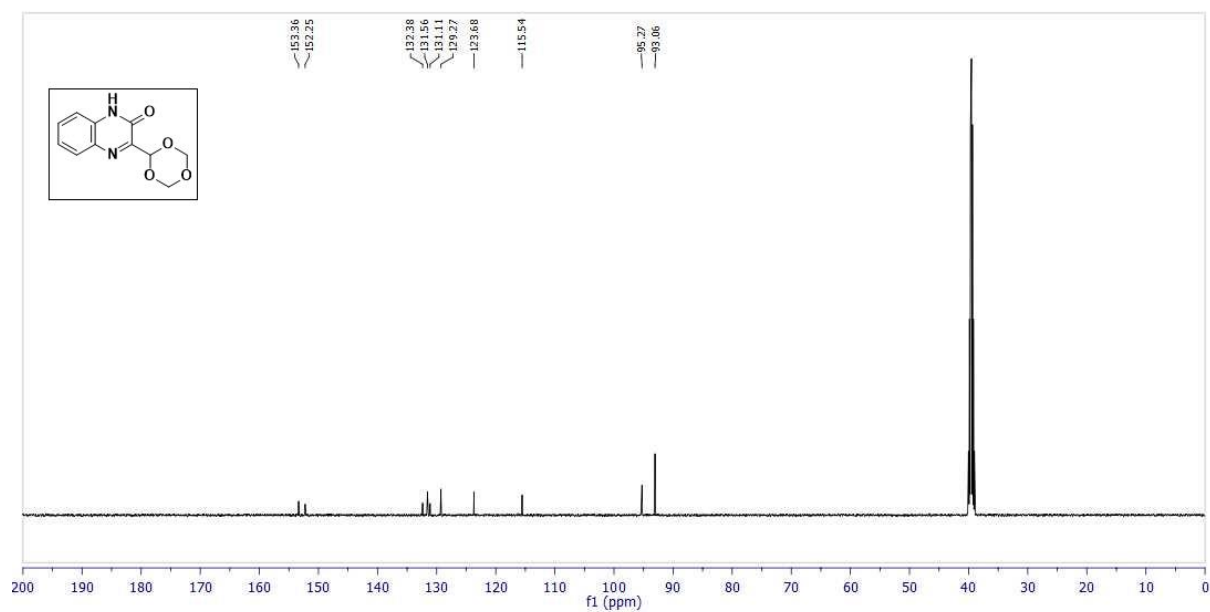

**<sup>1</sup>H NMR spectrum of 3i (400 MHz, CDCl<sub>3</sub>):**

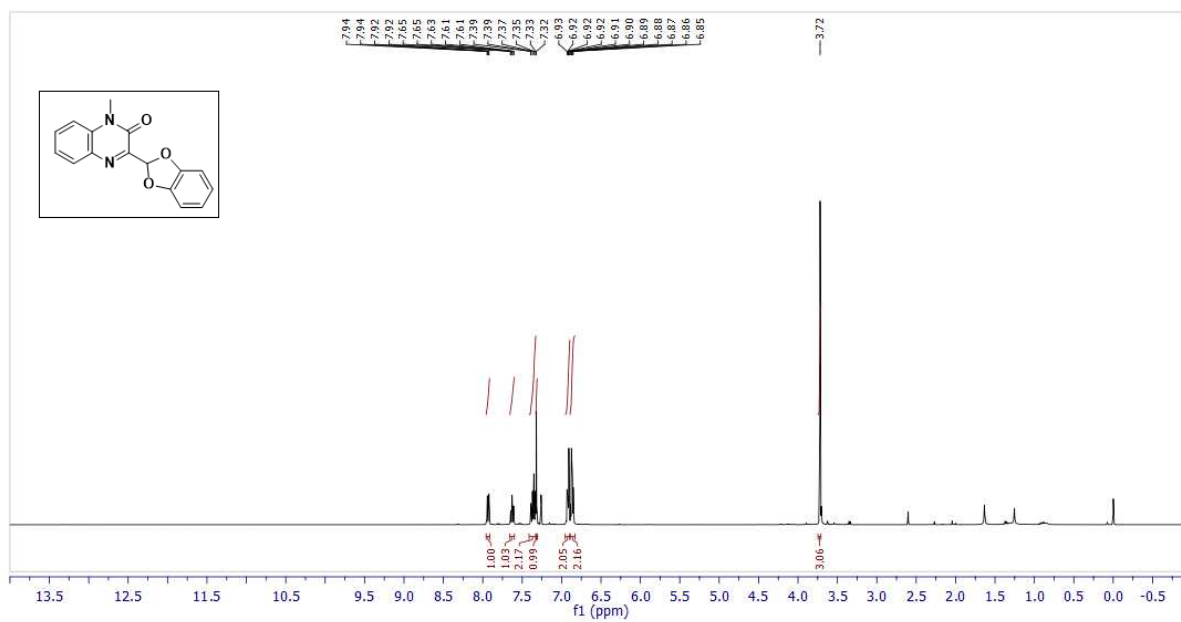

**<sup>13</sup>C NMR spectrum of 3i (126 MHz, CDCl<sub>3</sub>):**

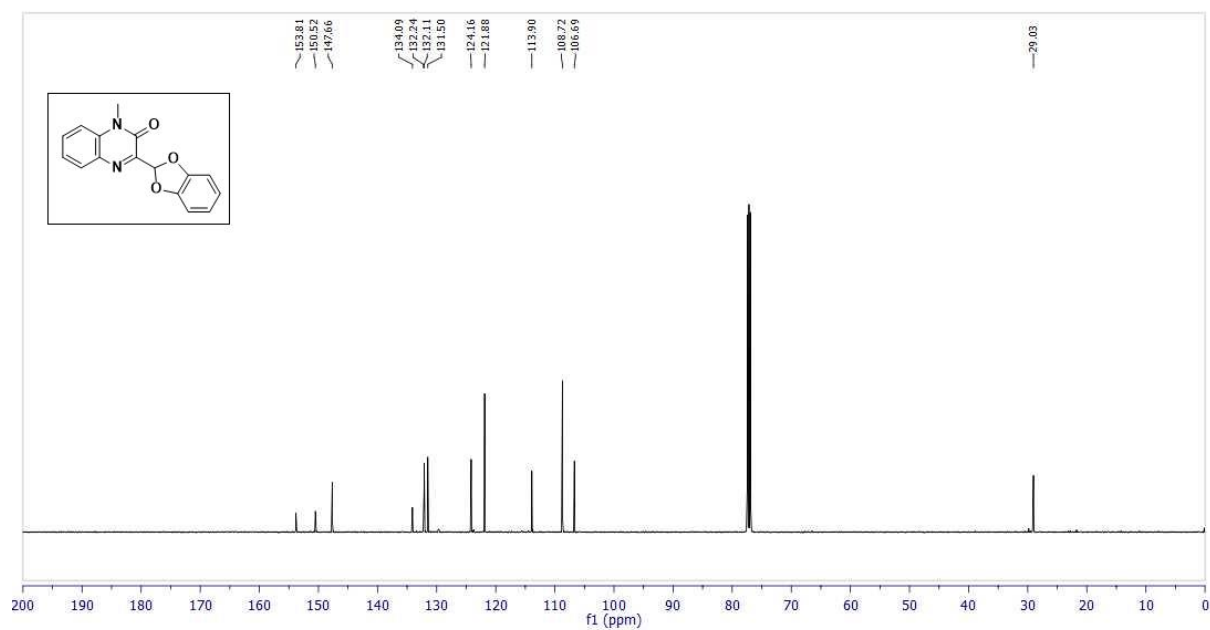

**<sup>1</sup>H NMR spectrum of 3j (500 MHz, CDCl<sub>3</sub>):**

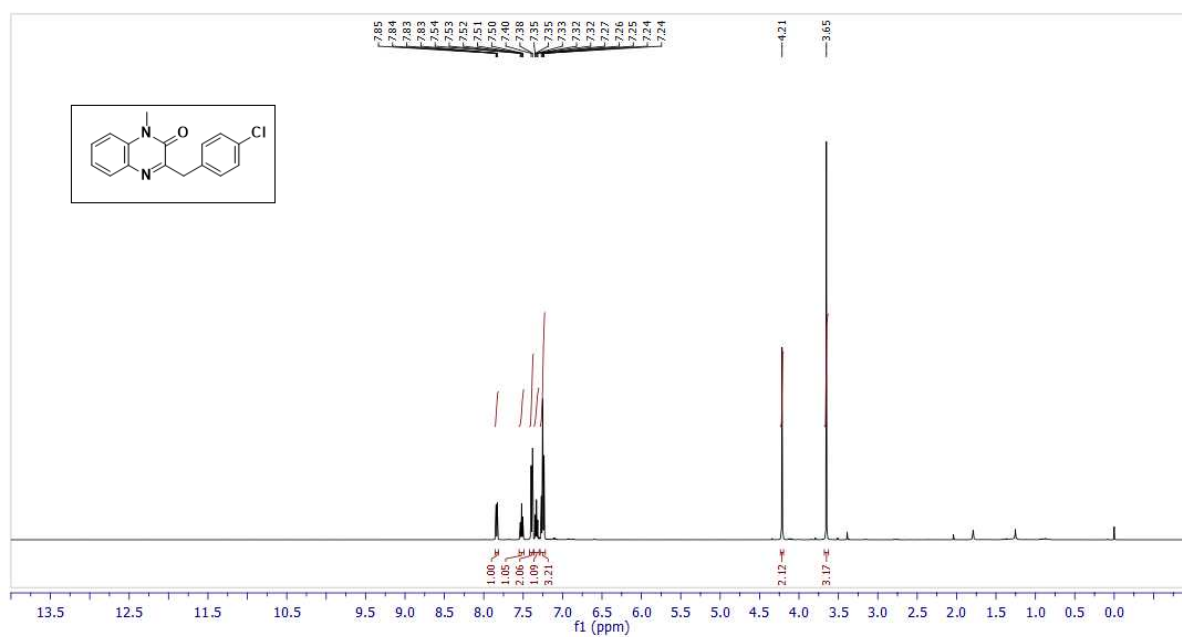

**<sup>13</sup>C NMR spectrum of 3j (126 MHz, CDCl<sub>3</sub>):**

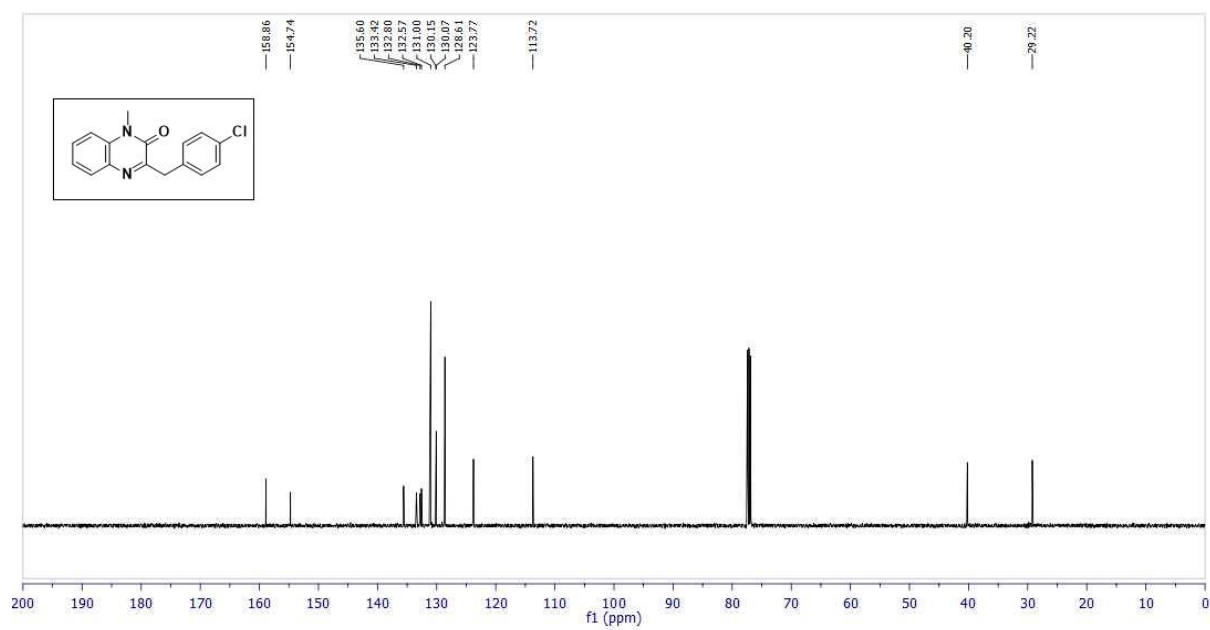

**<sup>1</sup>H NMR spectrum of 3k (500 MHz, CDCl<sub>3</sub>):**

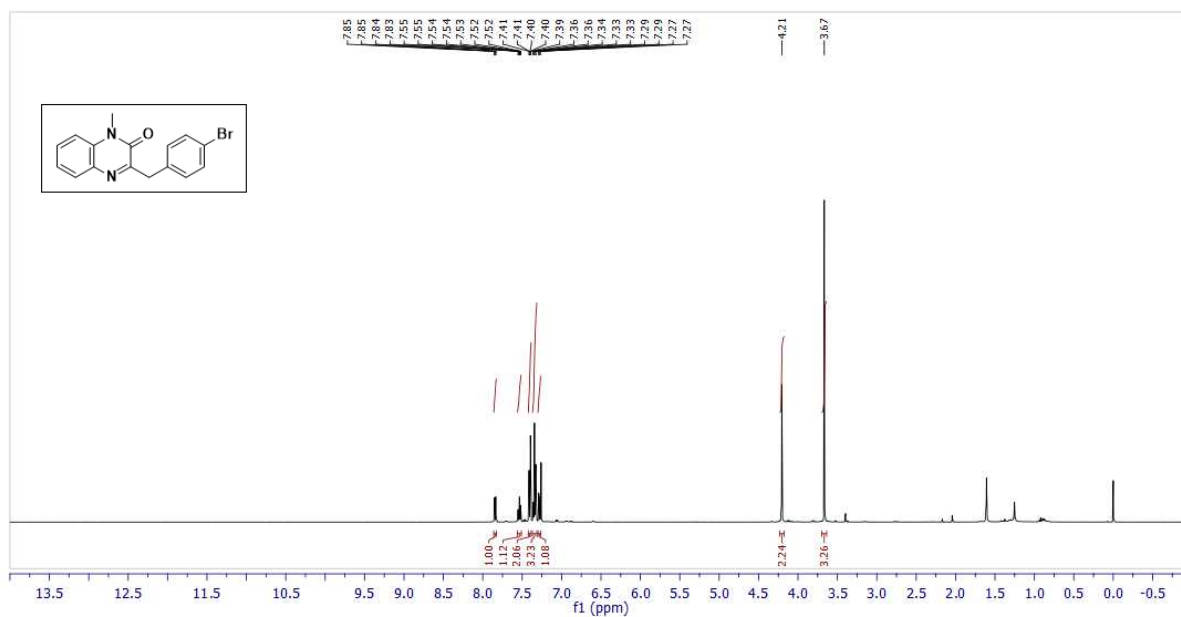

**<sup>13</sup>C NMR spectrum of 3k (126 MHz, CDCl<sub>3</sub>):**

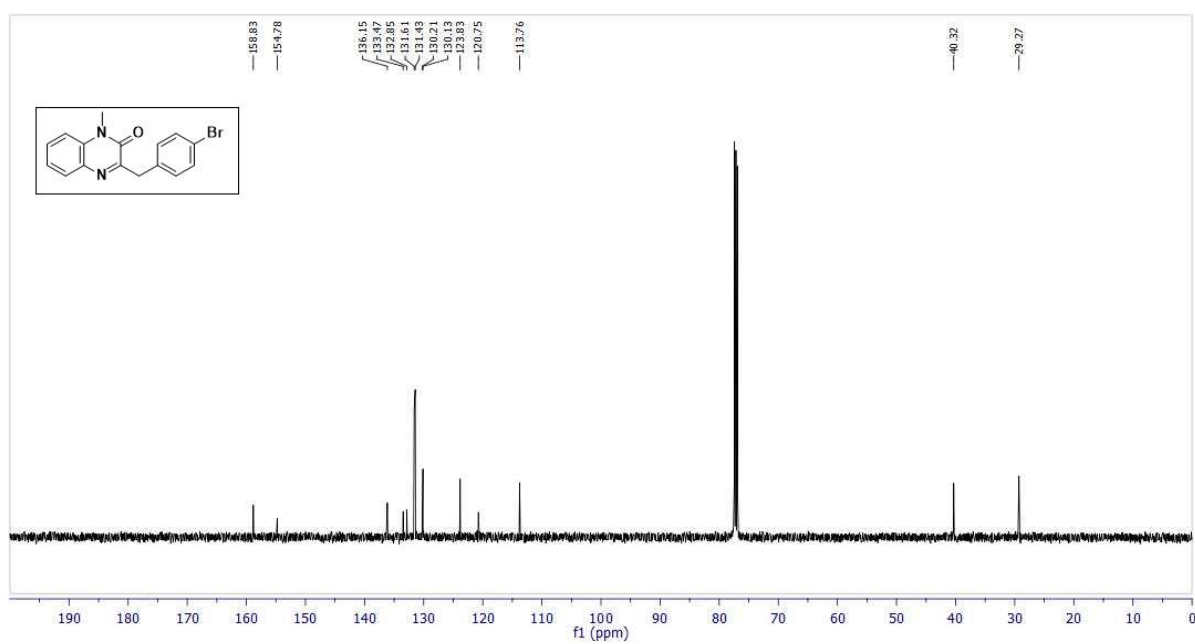

**<sup>1</sup>H NMR spectrum of 3l (500 MHz, CDCl<sub>3</sub>):**

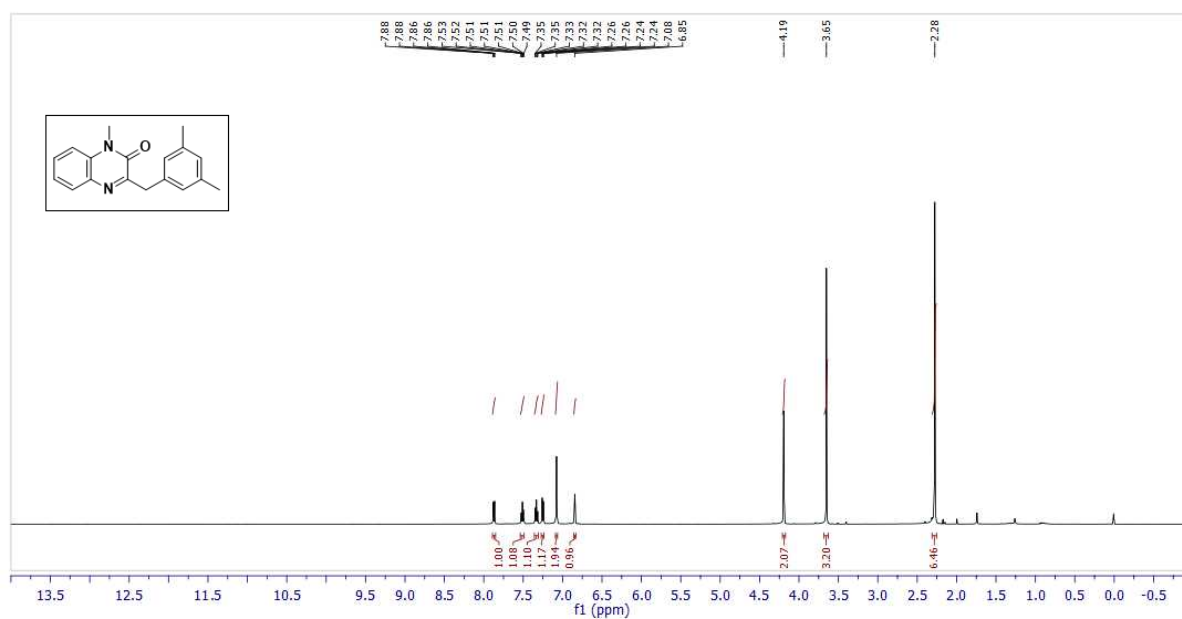

**<sup>13</sup>C NMR spectrum of 3l (126 MHz, CDCl<sub>3</sub>):**

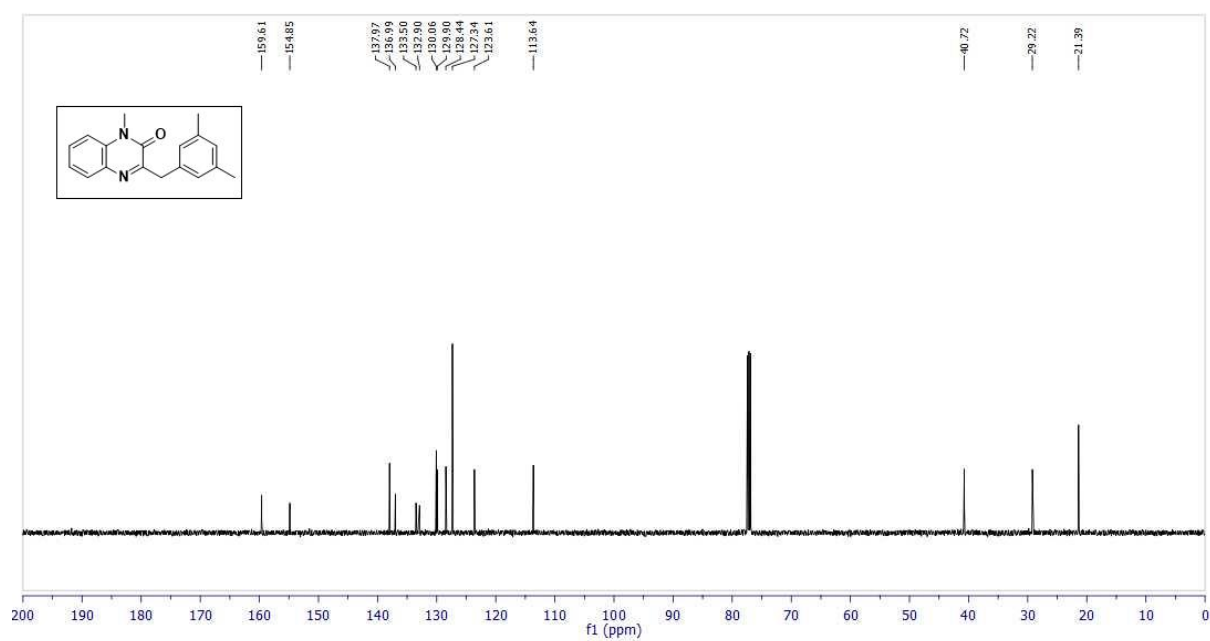

**<sup>1</sup>H NMR spectrum of 3m (500 MHz, DMSO-d<sub>6</sub>):**

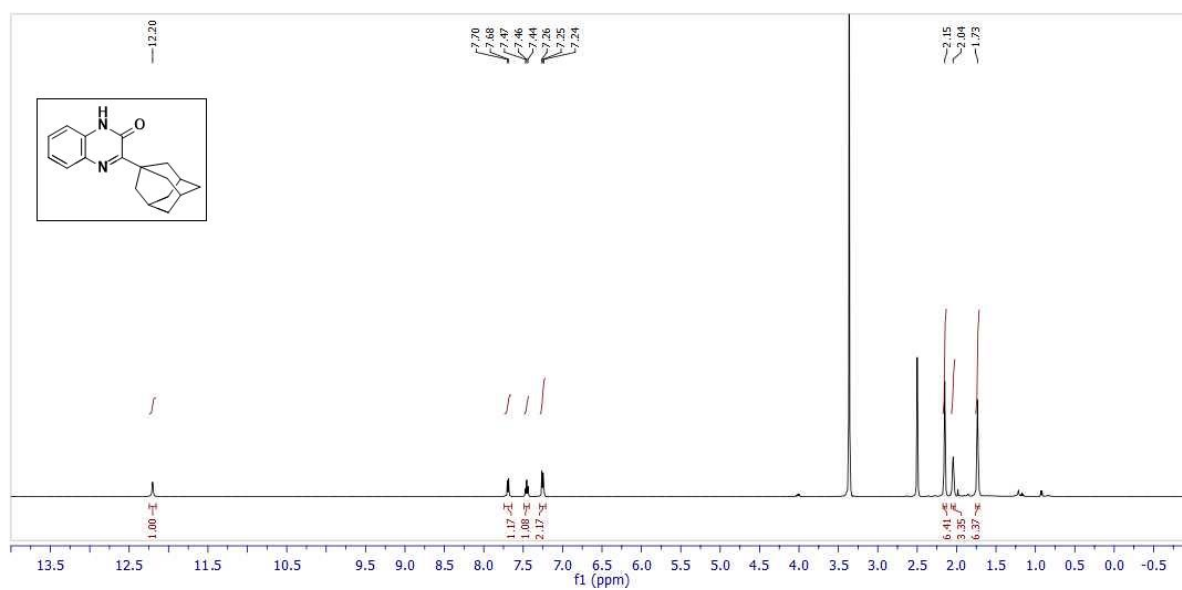

**<sup>13</sup>C NMR spectrum of 3m (126 MHz, DMSO-d<sub>6</sub>):**

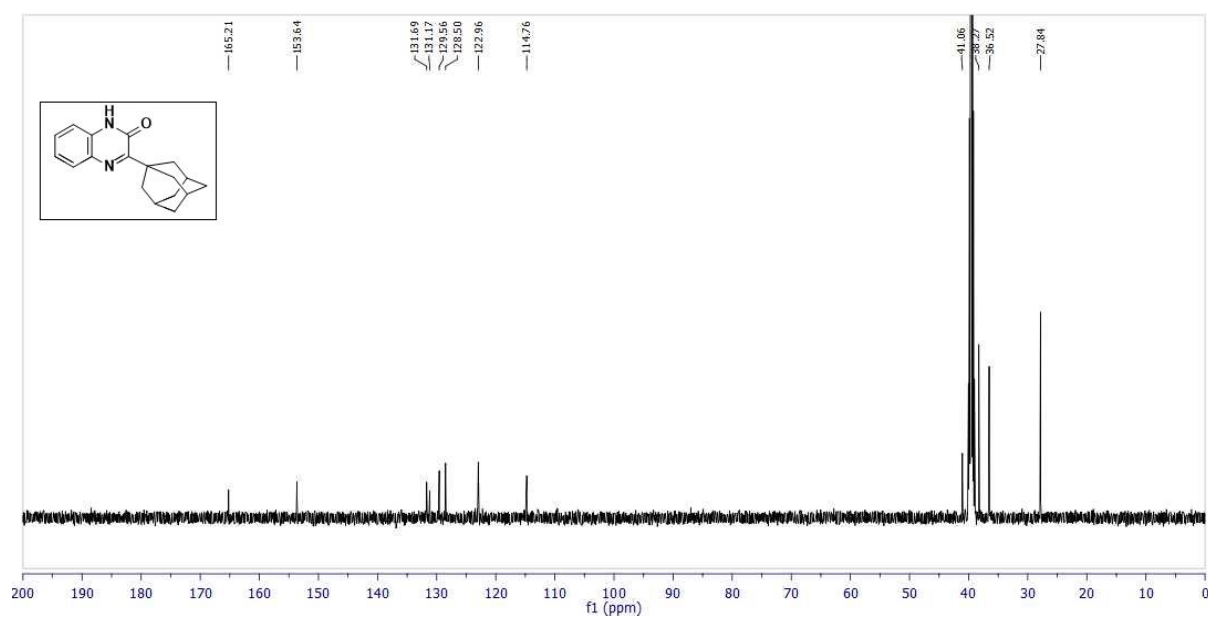

**DEPT135 NMR spectrum of 3m (126 MHz, DMSO-d6):**

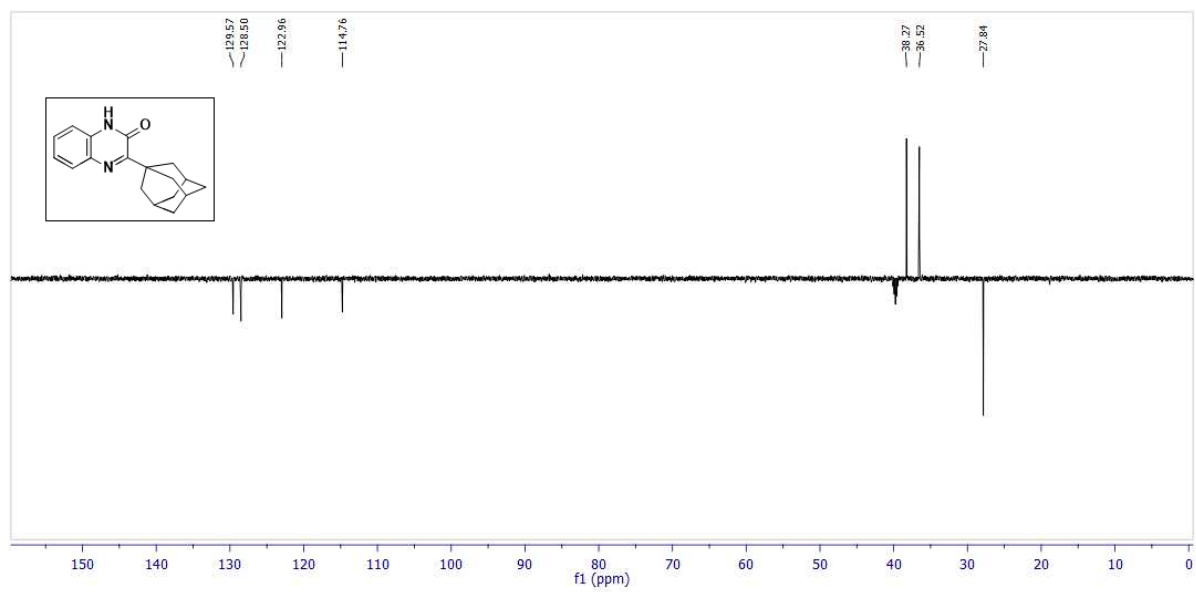

**<sup>1</sup>H NMR spectrum of 3n (500 MHz, DMSO-d<sub>6</sub>):**

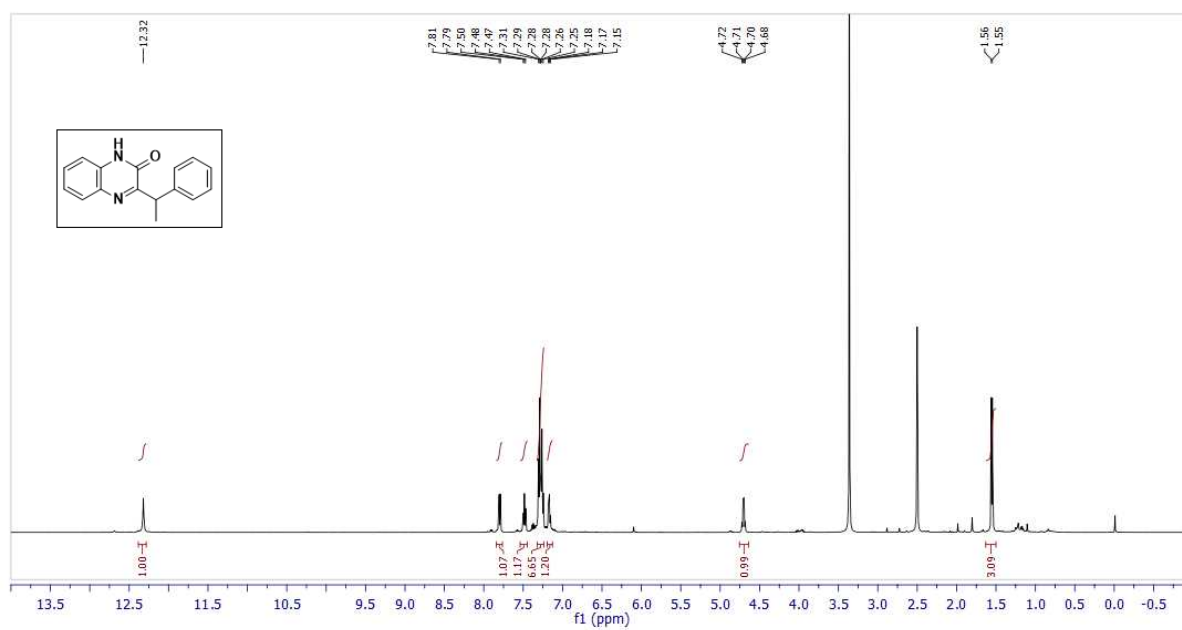

**<sup>13</sup>C NMR spectrum of 3n (126 MHz, DMSO-d<sub>6</sub>):**

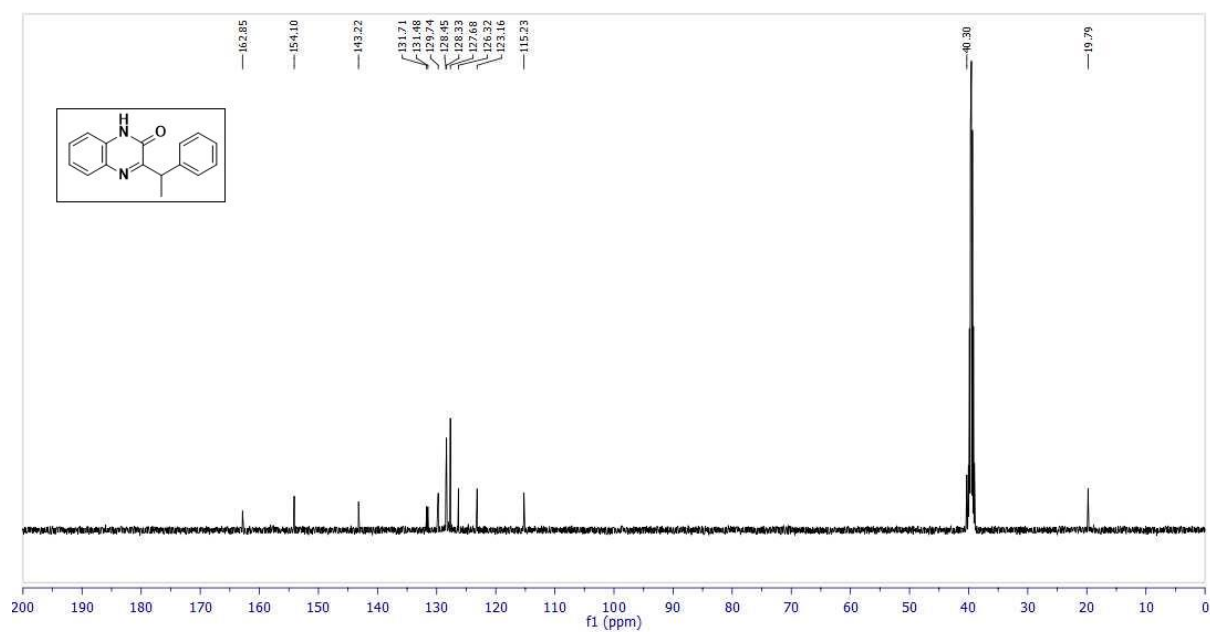

[illegible]

Chemical structures of 30a and 30b are shown. 30a is a benzimidazole derivative with a tert-butyl group. 30b is a benzimidazole derivative with an isobutyl group.

<sup>13</sup>C NMR peaks (ppm):

- 185.41, 184.78 (Carbonyl carbons)
- 157.07, 156.69 (Imidazole ring carbons)
- 133.15, 133.12, 130.88, 130.67, 130.63, 128.99, 124.07 (Aromatic ring carbons)
- 115.69 (Imidazole ring carbon)
- 35.66, 35.55, 34.60, 29.92, 26.49, 22.97, 18.85, 14.97, 14.21, 12.18 (Aliphatic carbons)

**DEPT135 NMR spectrum of 3o (101 MHz, CDCl<sub>3</sub>):**

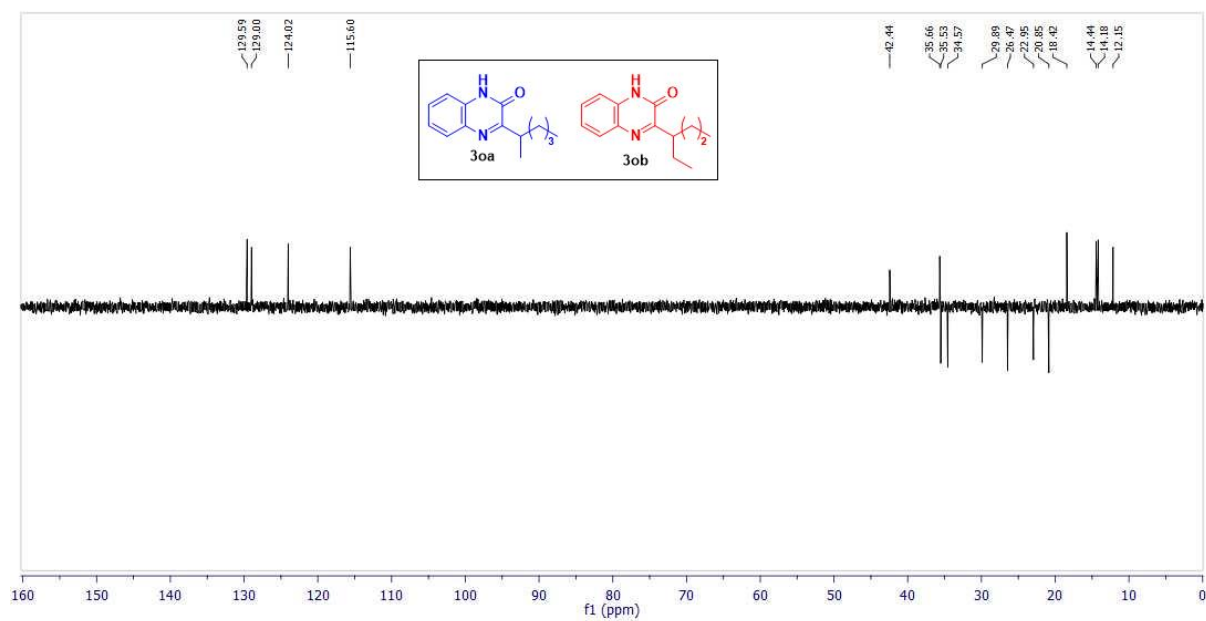

**<sup>1</sup>H NMR spectrum of 4a (500 MHz, CDCl<sub>3</sub>):**

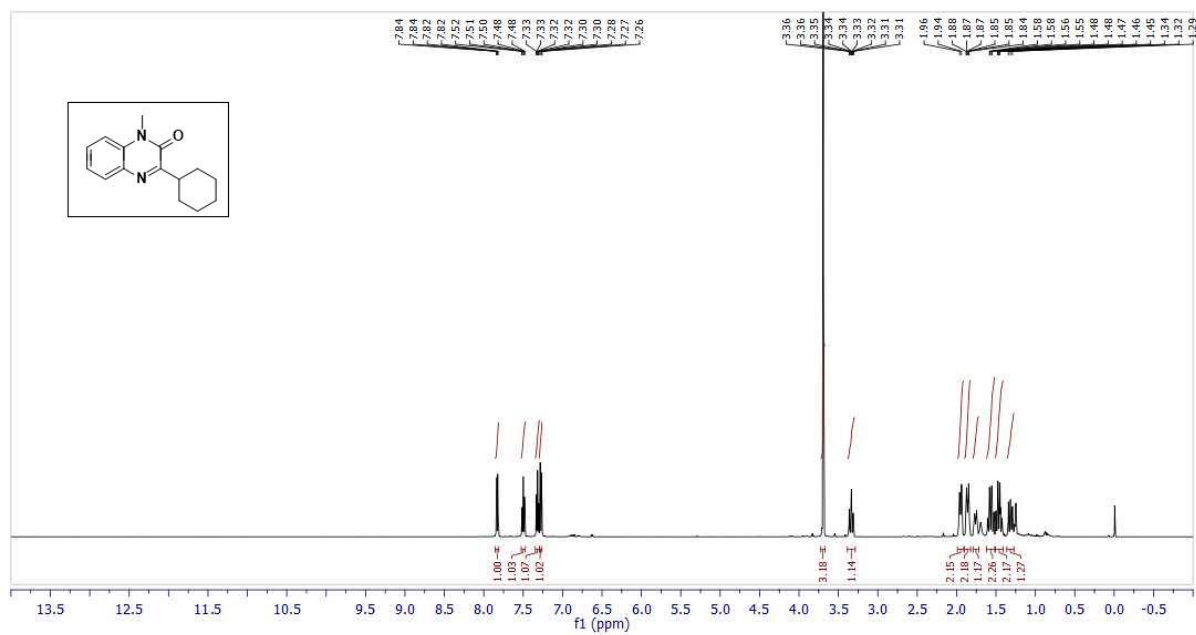

**<sup>13</sup>C NMR spectrum of 4a (126 MHz, CDCl<sub>3</sub>):**

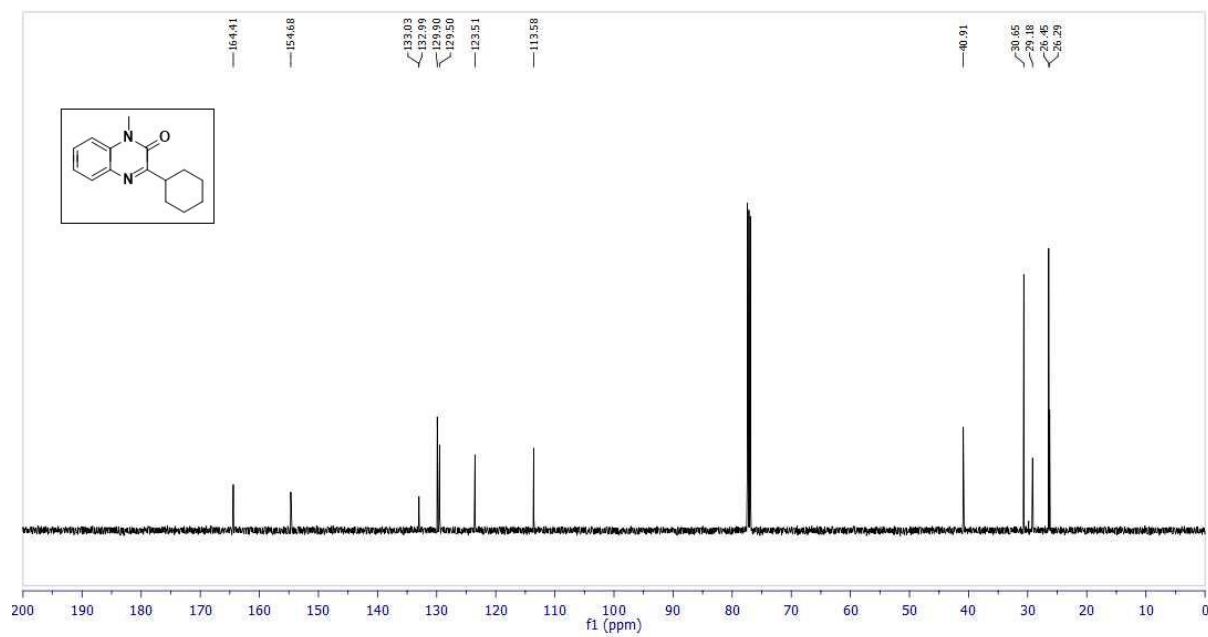

Chemical structure of 2-(cyclohexylidene)-1-(cyclopropylmethyl)-1H-benzimidazole is shown in the inset. The  $^1\text{H}$  NMR spectrum (400 MHz,  $\text{CDCl}_3$ ) displays the following peaks and integrations:

| Chemical Shift (ppm)  | Integration                        |
|-----------------------|------------------------------------|
| 7.2 - 7.8 (multiplet) | 0.99, 1.00, 1.01                   |
| 3.4 (triplet)         | 2.08                               |
| 1.0 (doublet)         | 0.99                               |
| 1.2 - 1.8 (multiplet) | 2.11, 2.13, 1.05, 2.18, 2.27, 2.32 |
| 0.5 (singlet)         | 4.04                               |

Chemical structure: C1CCN2C(=O)C(C3CCCCC3)=NC2=C1CC4CC4

<sup>13</sup>C NMR peaks (ppm):

- 164.58
- 154.63
- 133.23
- 132.39
- 130.11
- 129.36
- 123.29
- 113.85
- 76.93 (CDCl<sub>3</sub>)
- 46.23
- 40.89
- 30.66
- 26.47
- 26.31
- 9.74
- 4.25

**<sup>1</sup>H NMR spectrum of 4c (500 MHz, CDCl<sub>3</sub>):**

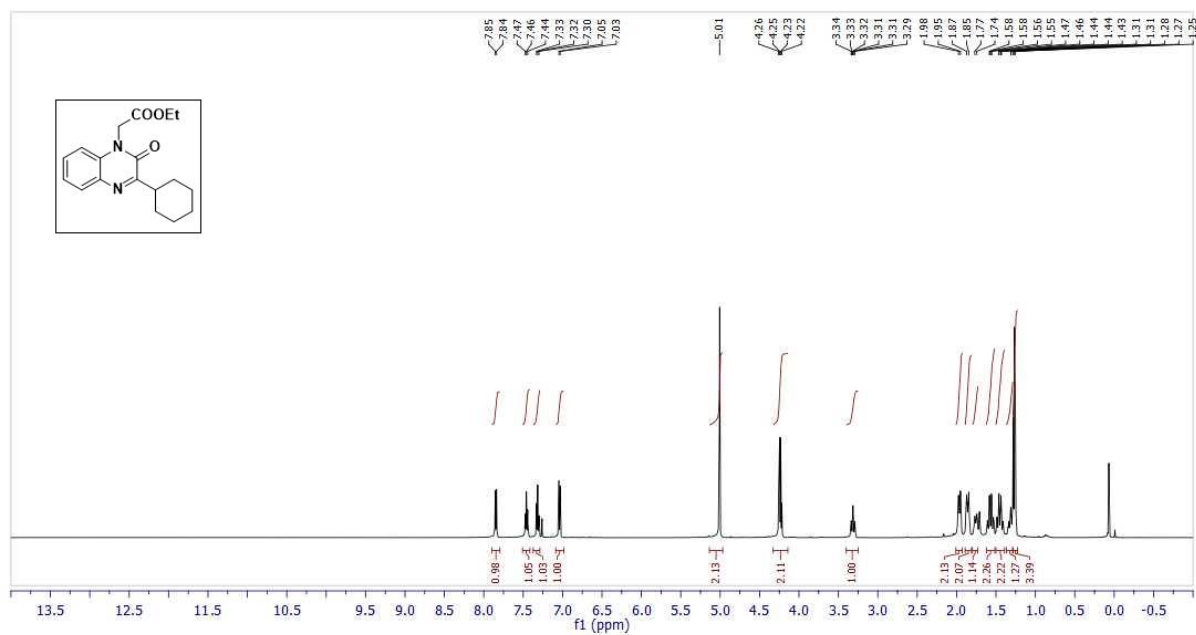

**<sup>13</sup>C NMR spectrum of 4c (126 MHz, CDCl<sub>3</sub>):**

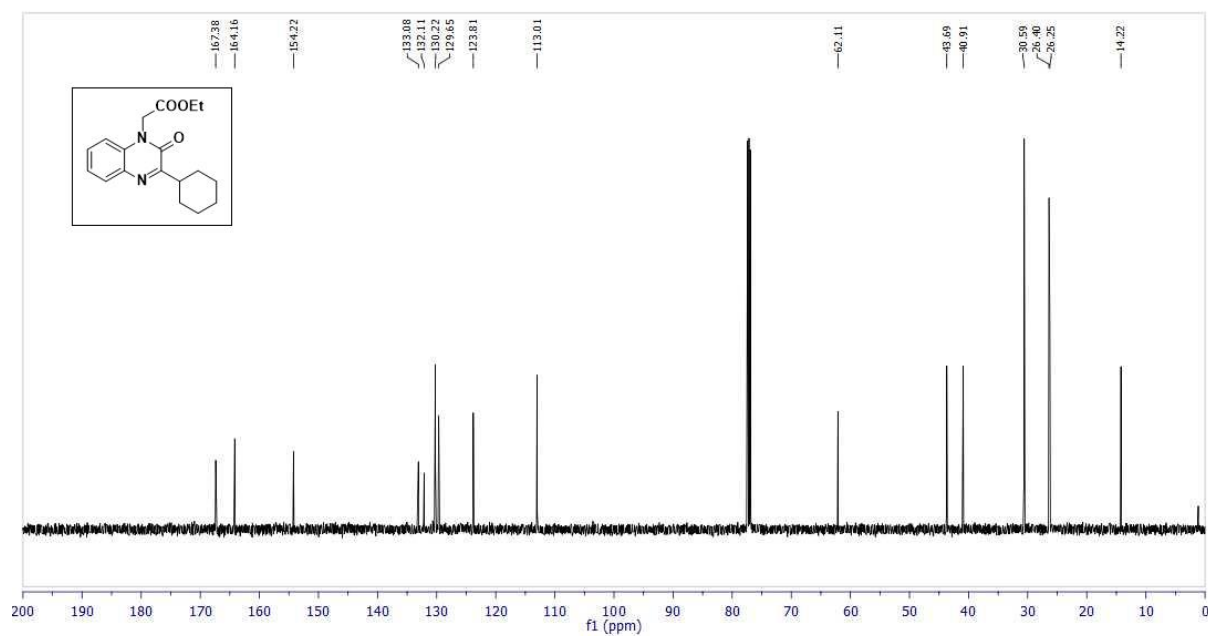

**<sup>1</sup>H NMR spectrum of 4d (500 MHz, CDCl<sub>3</sub>):**

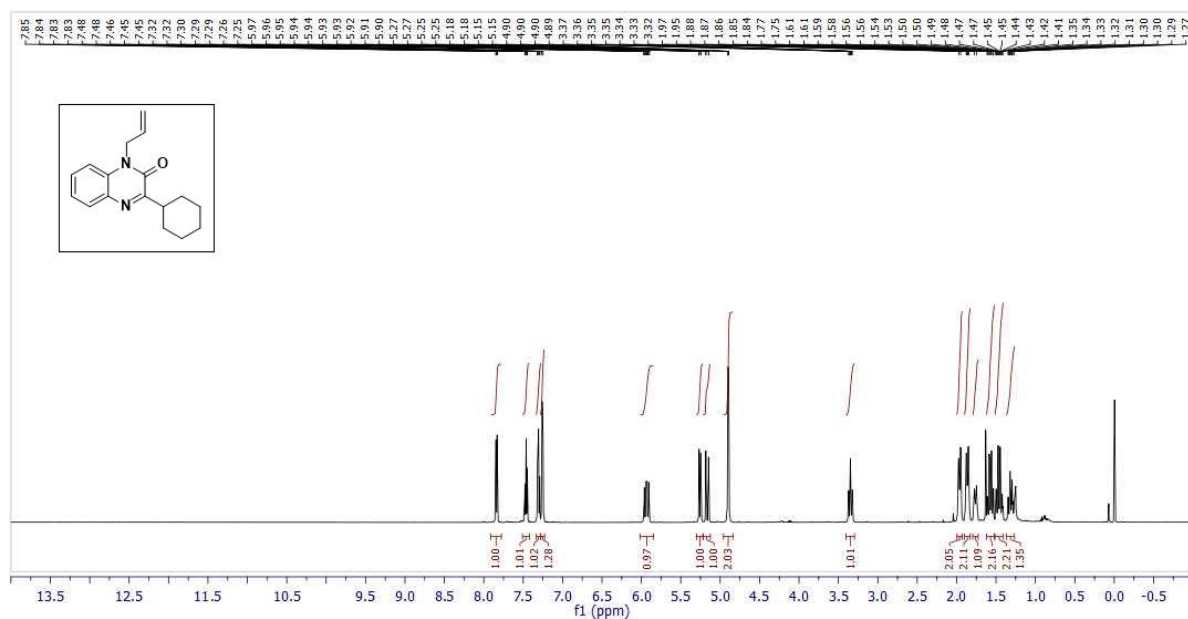

**$^{13}\text{C}$  NMR spectrum of 4d (126 MHz,  $\text{CDCl}_3$ ):**

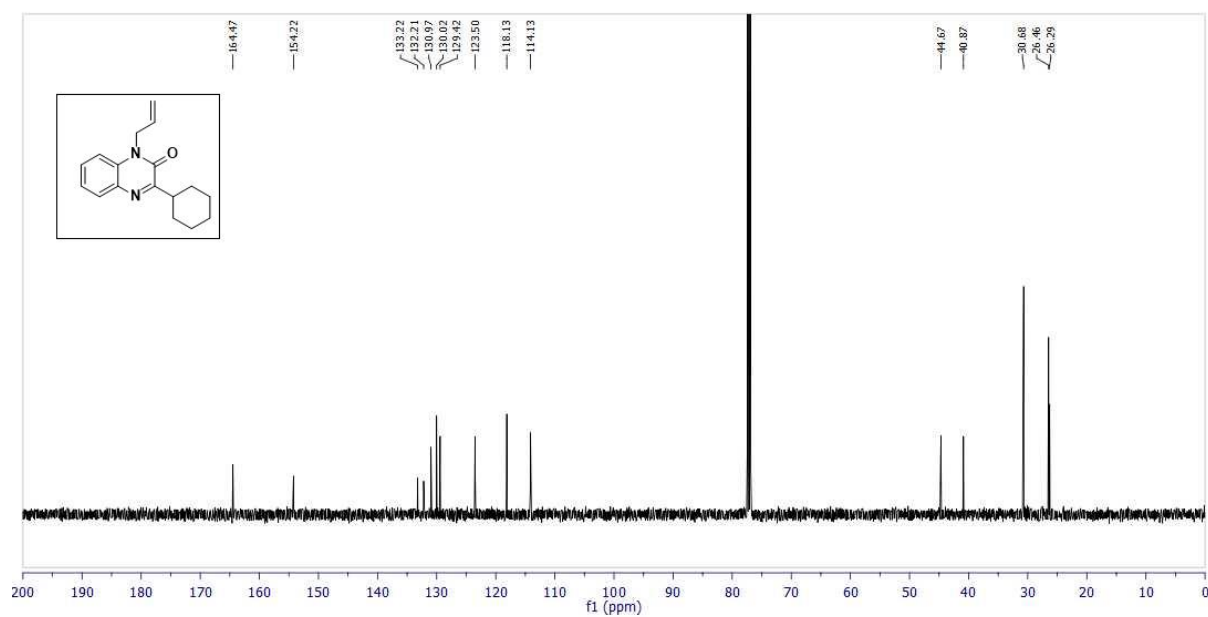

**<sup>1</sup>H NMR spectrum of 4e (500 MHz, CDCl<sub>3</sub>):**

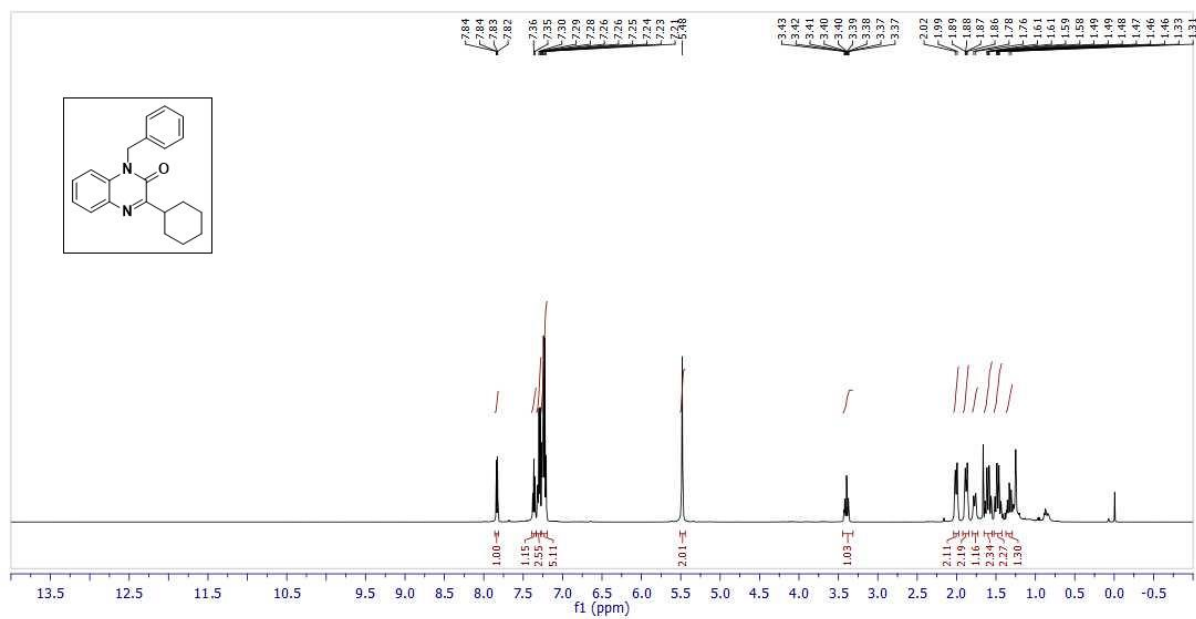

**<sup>13</sup>C NMR spectrum of 4e (126 MHz, CDCl<sub>3</sub>):**

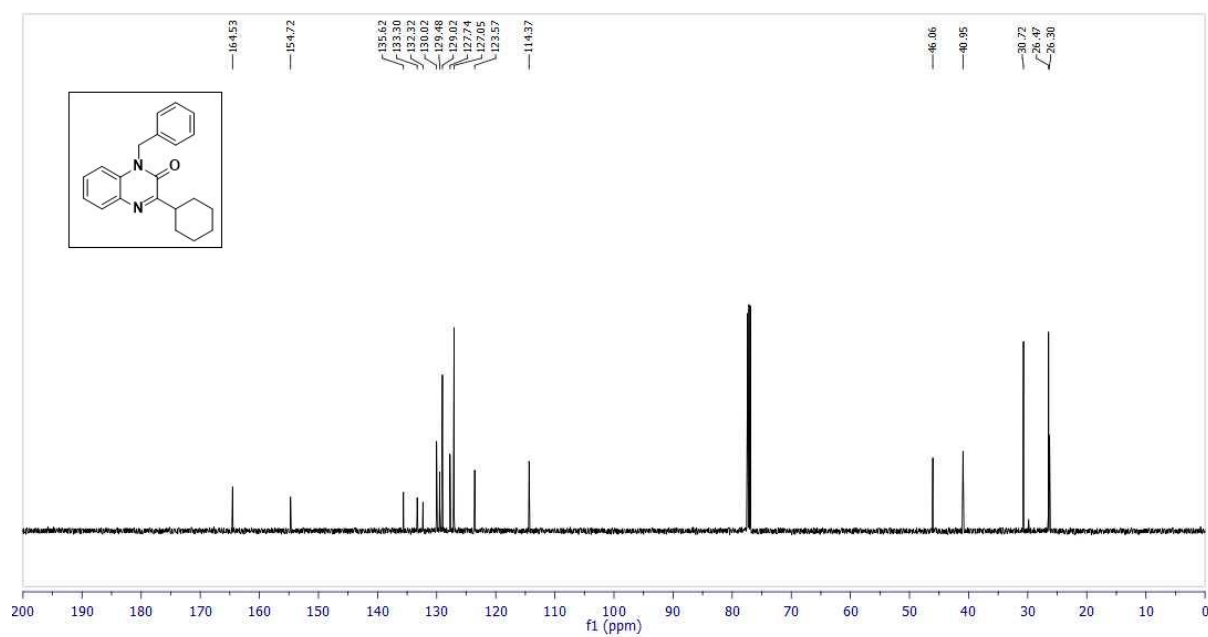

**<sup>1</sup>H NMR spectrum of 4f (500 MHz, DMSO-d<sub>6</sub>):**

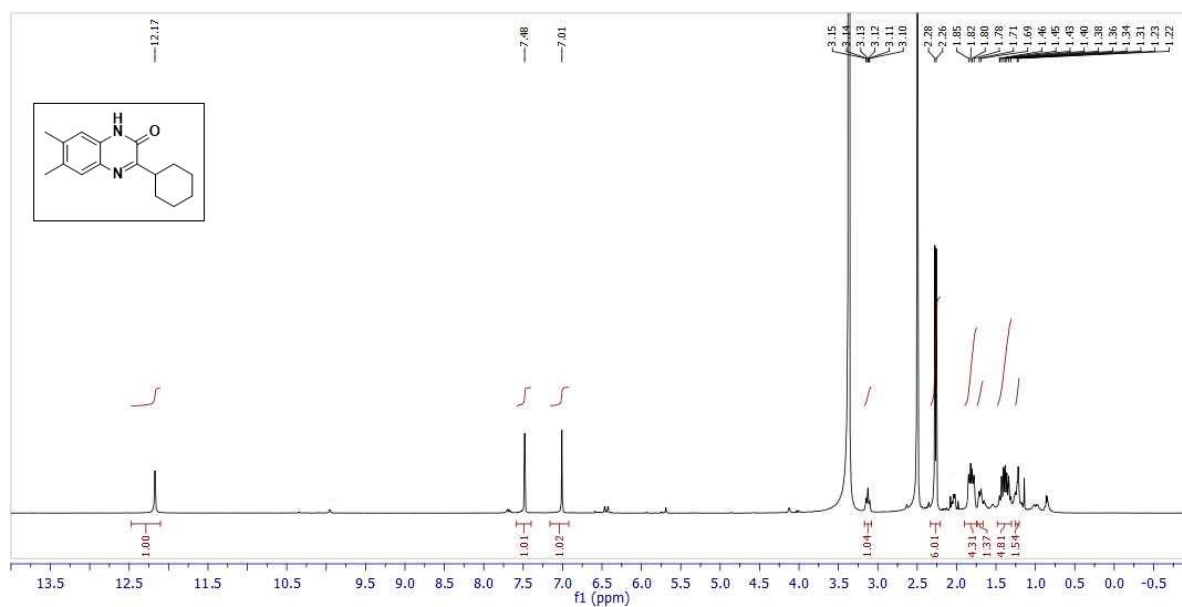

**<sup>13</sup>C NMR spectrum of 4f (126 MHz, DMSO-d<sub>6</sub>):**

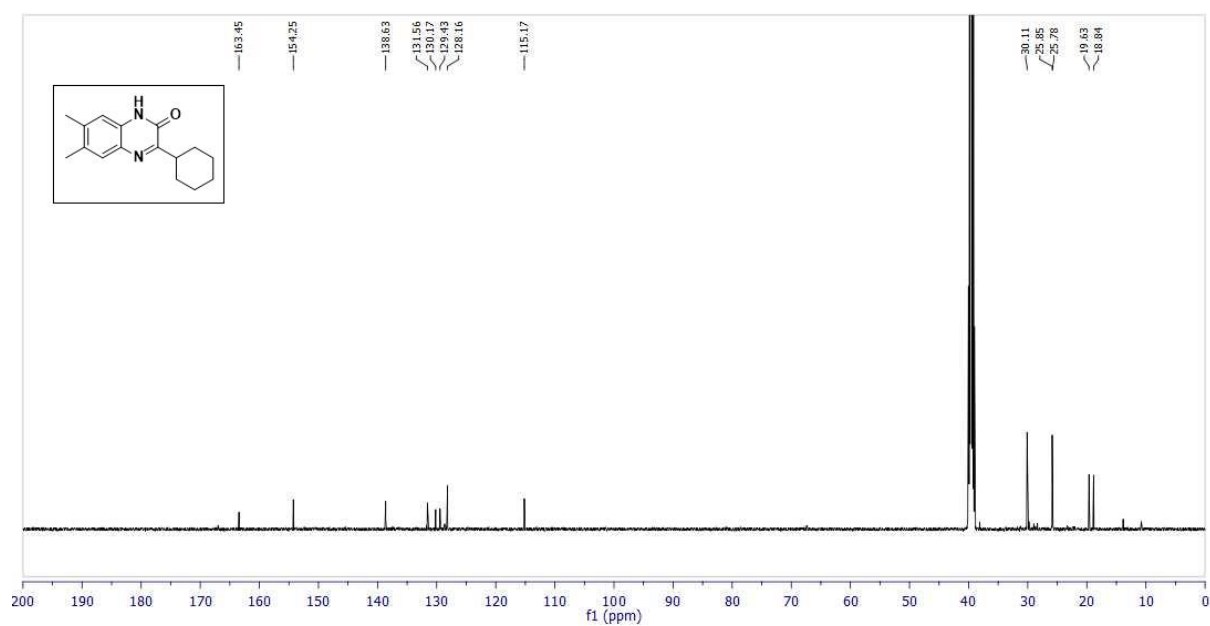

**$^1\text{H}$  NMR spectrum of 4g (500 MHz,  $\text{CDCl}_3$ ):**

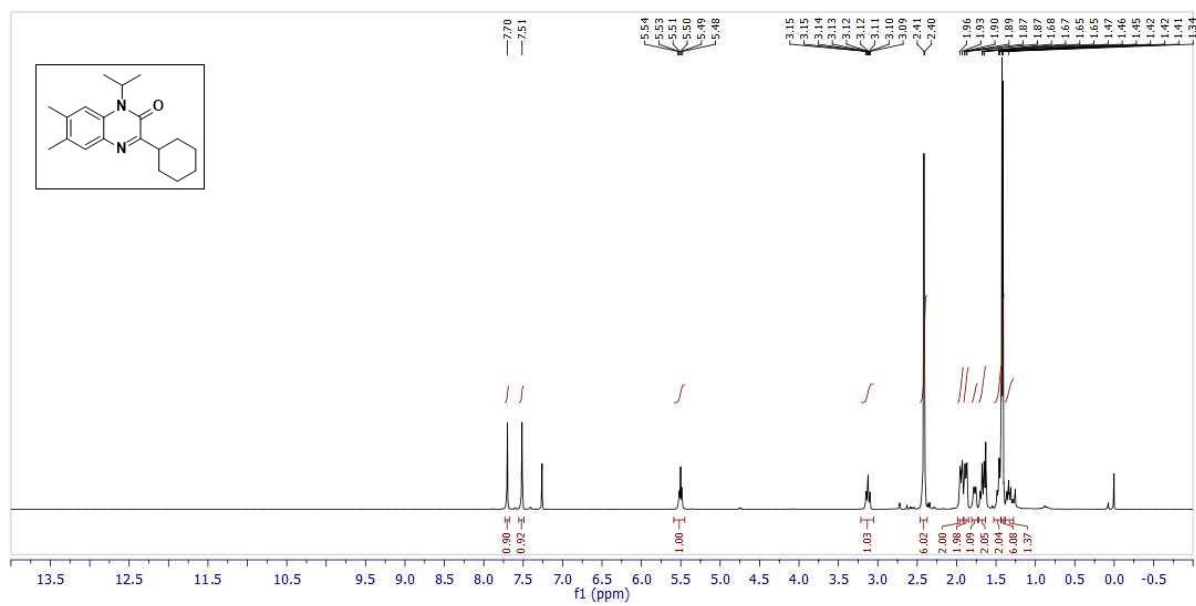

**$^{13}\text{C}$  NMR spectrum of 4g (126 MHz,  $\text{CDCl}_3$ ):**

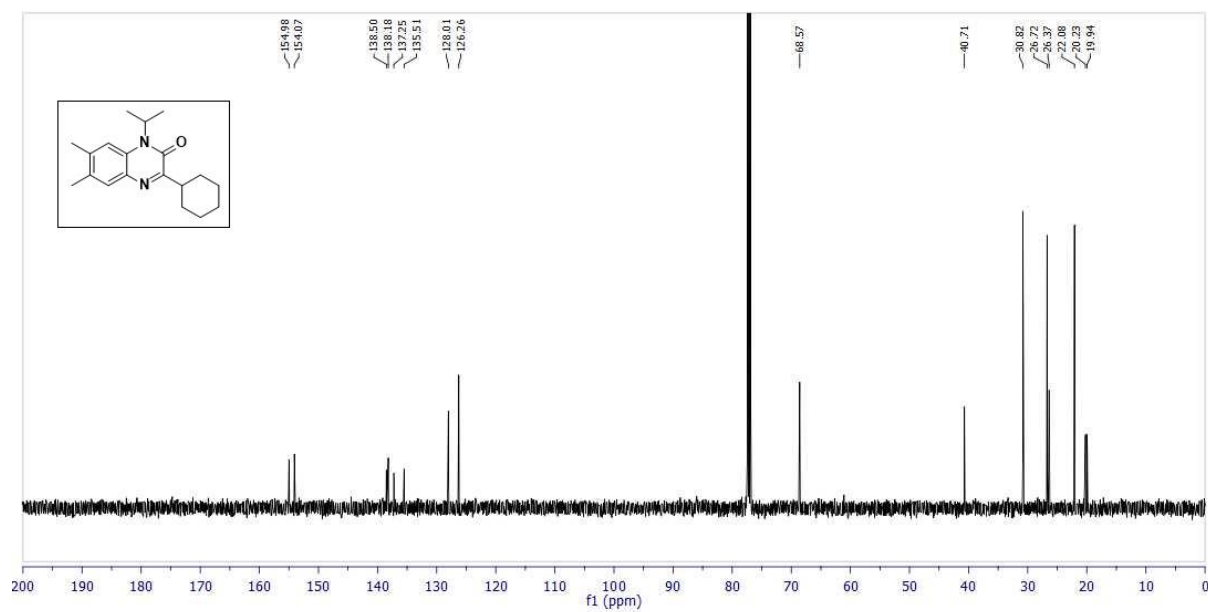

**<sup>1</sup>H NMR spectrum of 4h (400 MHz, CDCl<sub>3</sub>):**

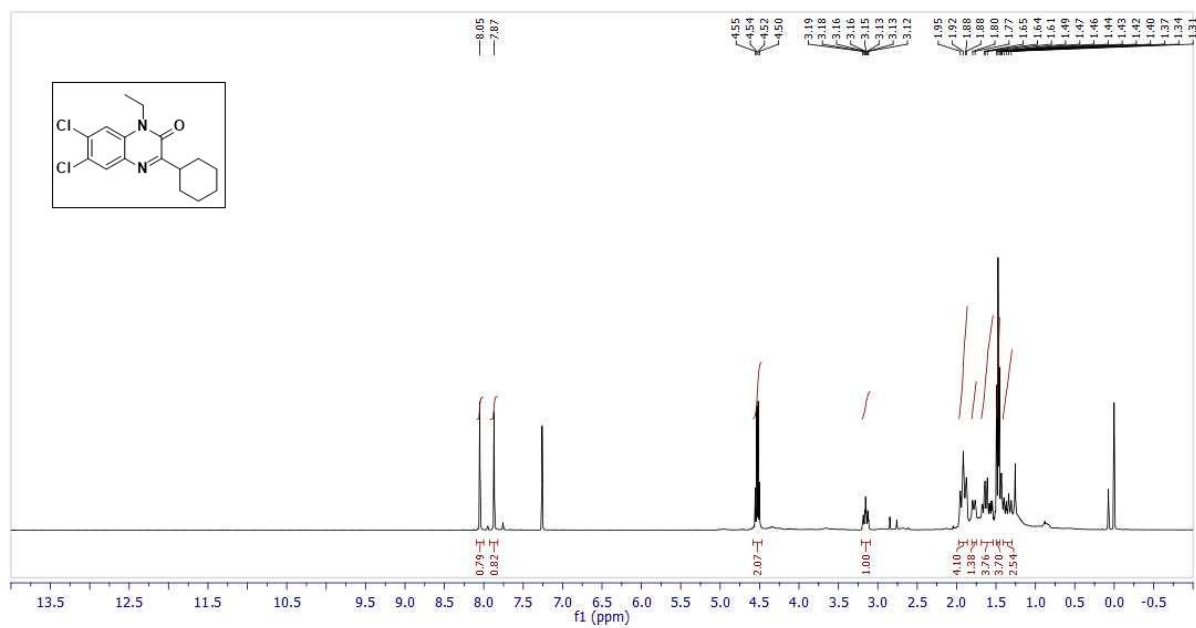

**<sup>13</sup>C NMR spectrum of 4h (126 MHz, CDCl<sub>3</sub>):**

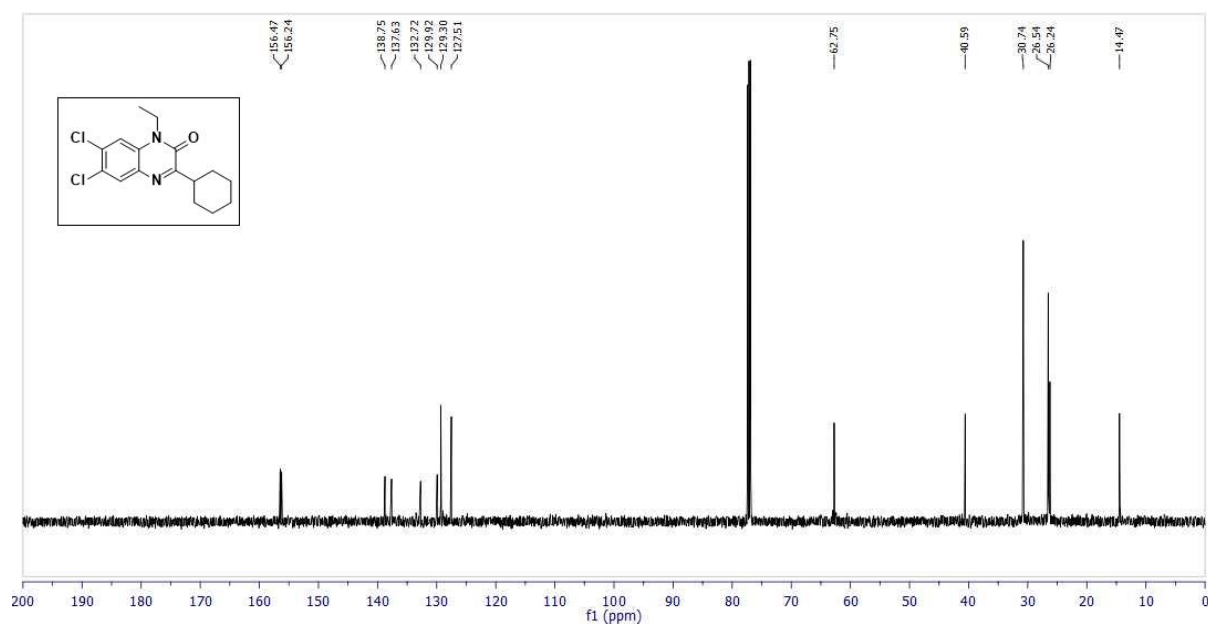

**<sup>1</sup>H NMR spectrum of 4i (500 MHz, CDCl<sub>3</sub>):**

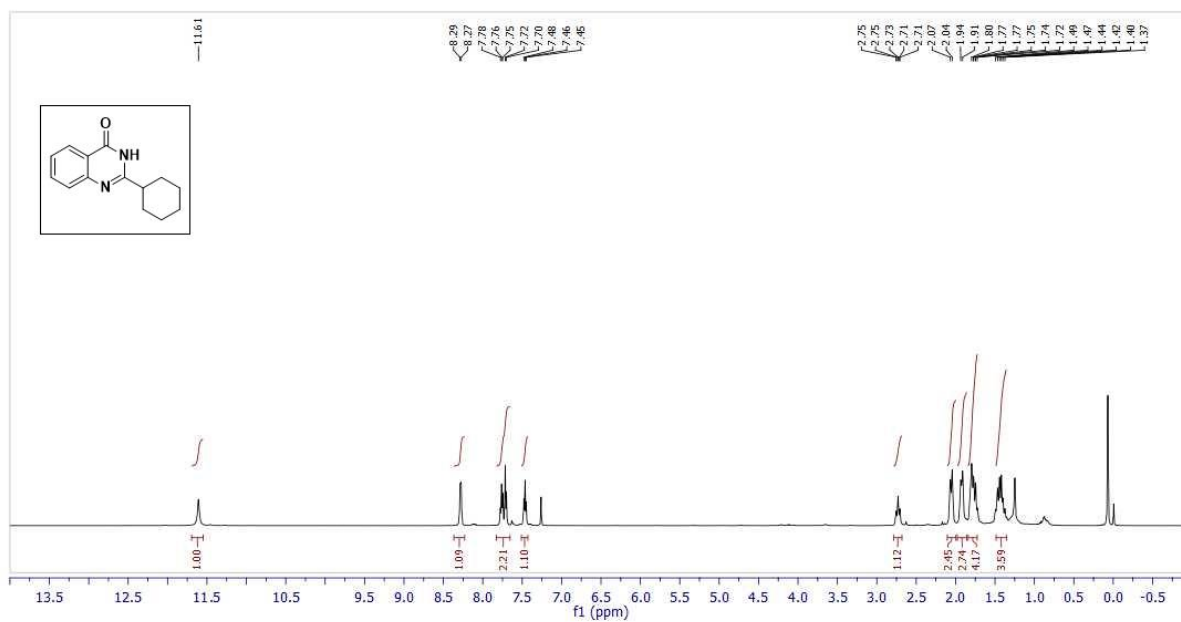

**<sup>13</sup>C NMR spectrum of 4i (126 MHz, CDCl<sub>3</sub>):**

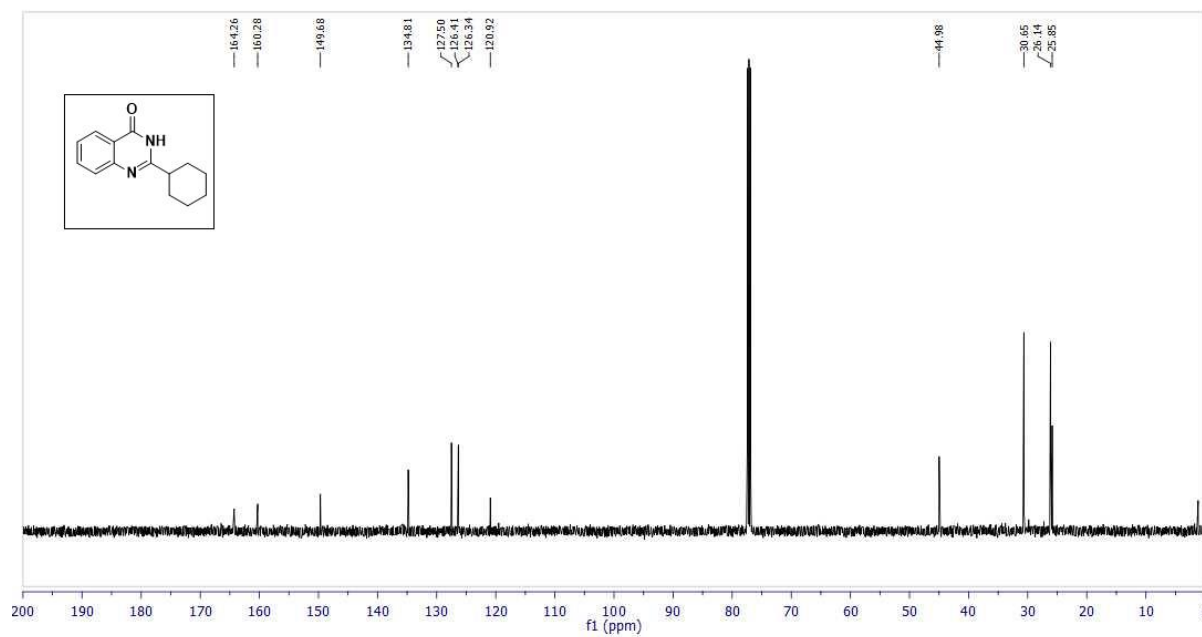

**<sup>1</sup>H NMR spectrum of 4j (500 MHz, CDCl<sub>3</sub>):**

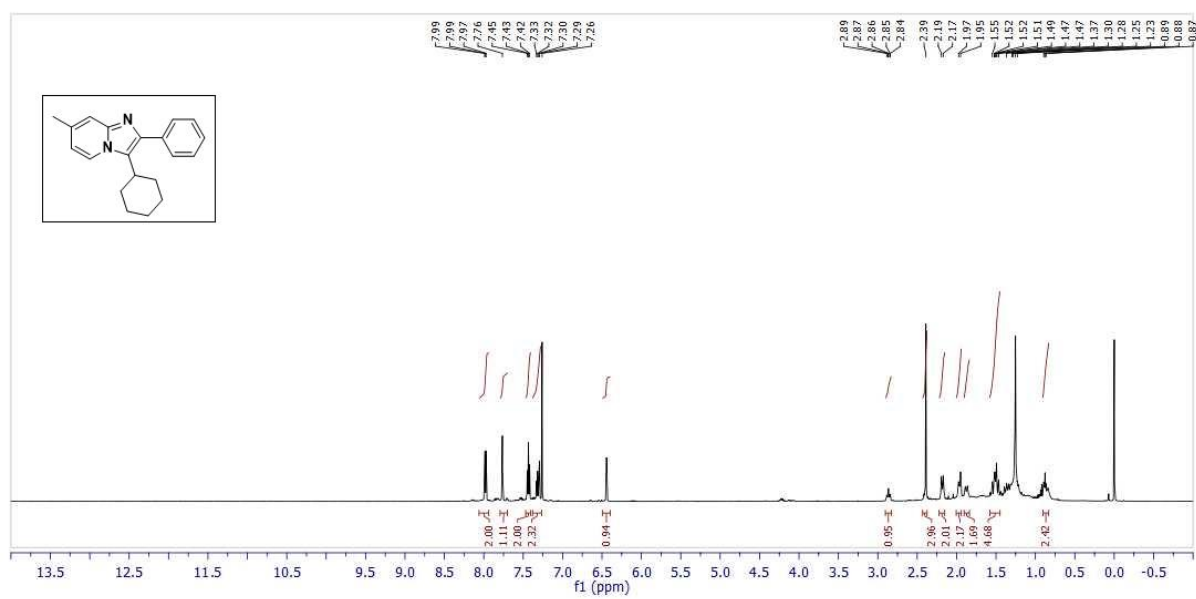

**<sup>13</sup>C NMR spectrum of 4j (126 MHz, CDCl<sub>3</sub>):**

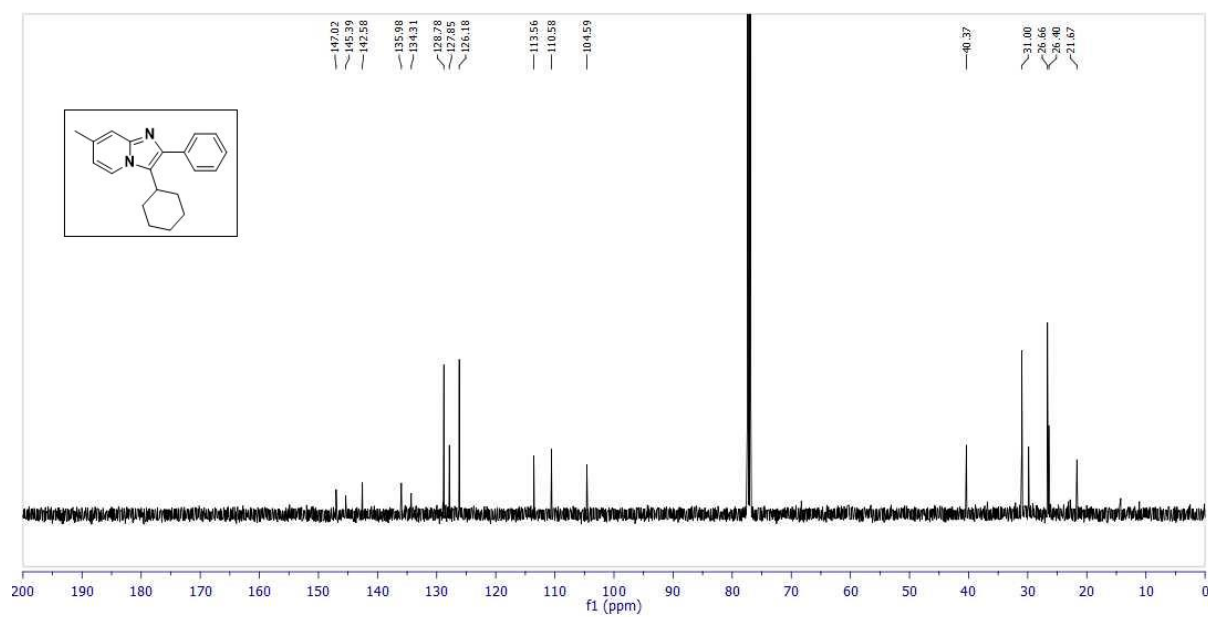

**<sup>1</sup>H NMR spectrum of 4k (500 MHz, CDCl<sub>3</sub>):**

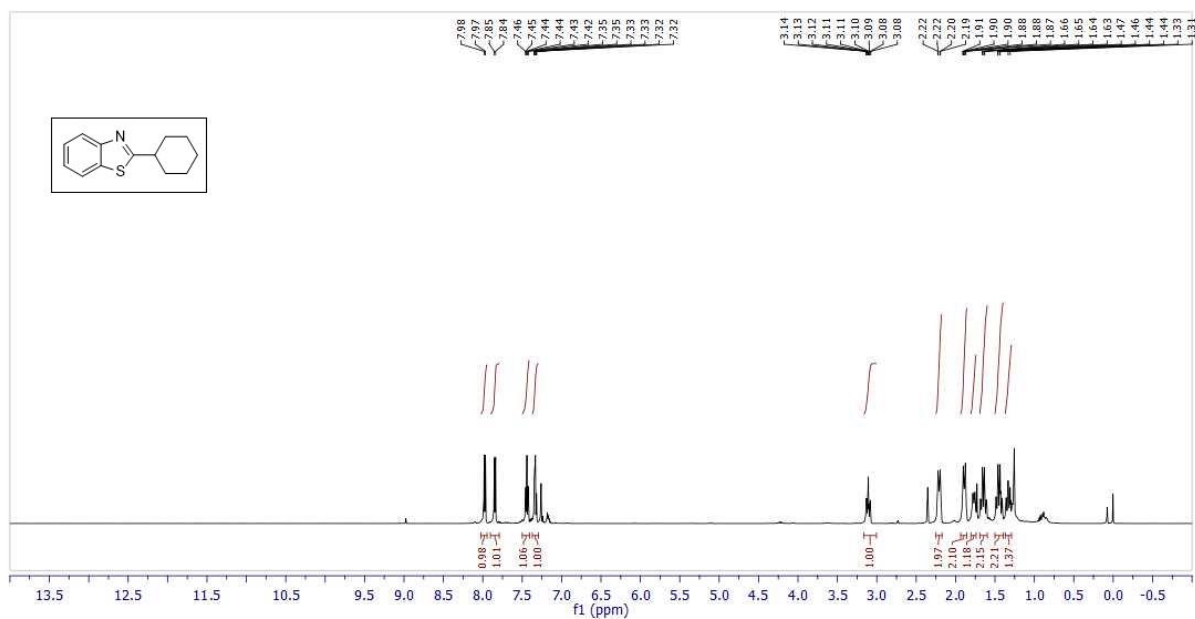

**<sup>13</sup>C NMR spectrum of 4k (126 MHz, CDCl<sub>3</sub>):**

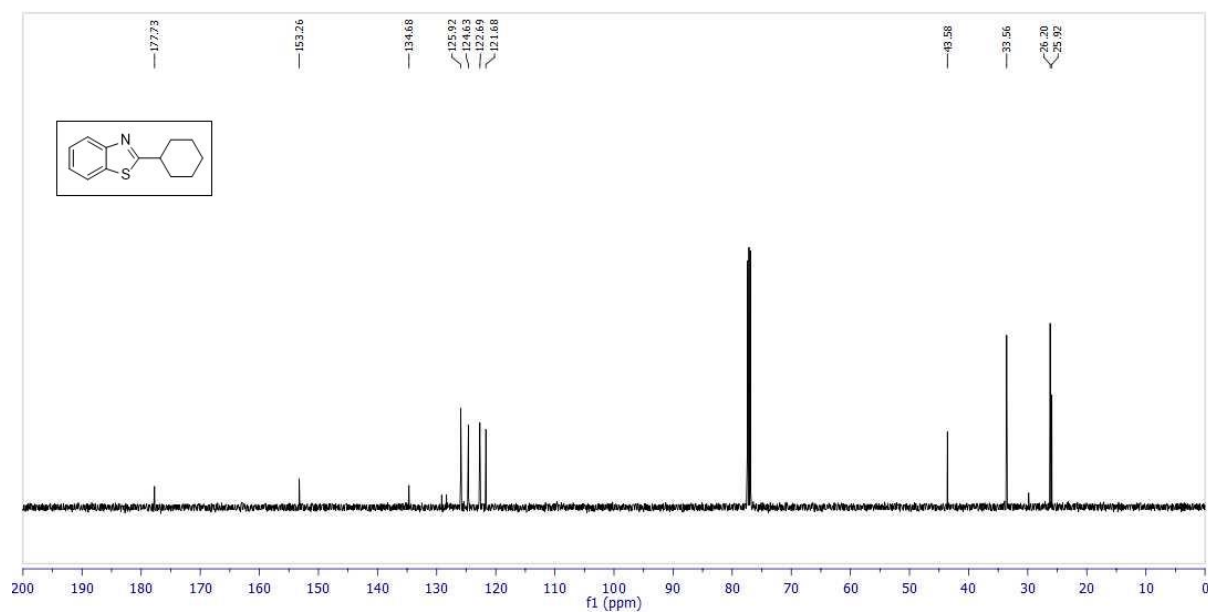

**$^1\text{H}$  NMR spectrum of 4l (500 MHz,  $\text{CDCl}_3$ ):**

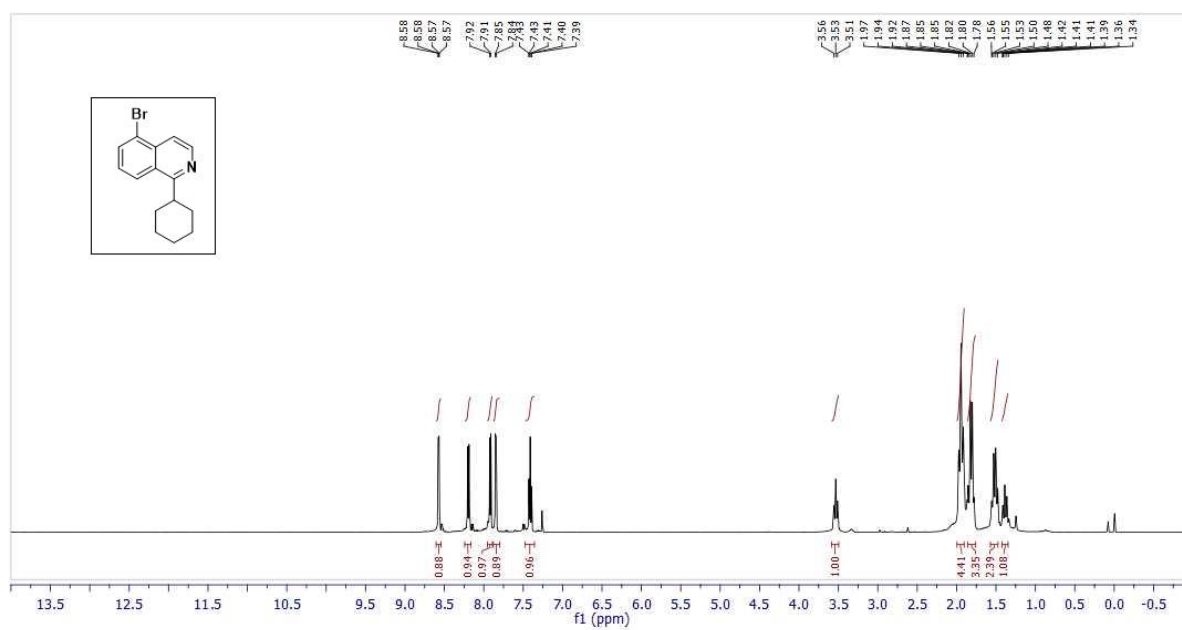

**$^{13}\text{C}$  NMR spectrum of 4l (126 MHz,  $\text{CDCl}_3$ ):**

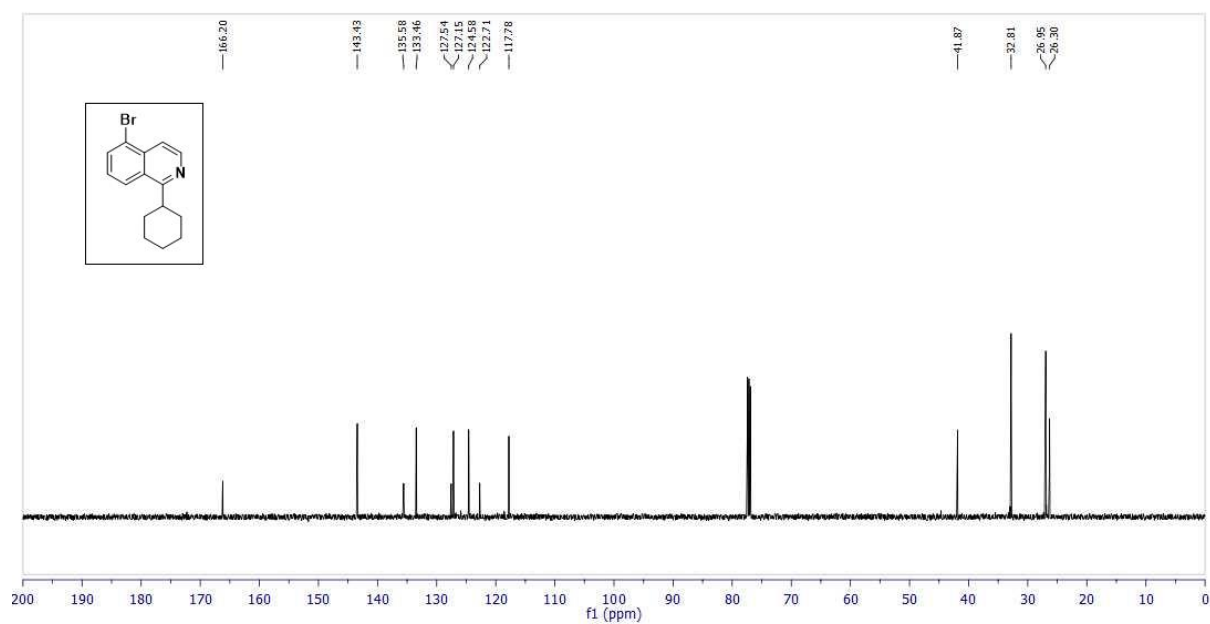

**$^1\text{H}$  NMR spectrum of 4m (500 MHz,  $\text{CDCl}_3$ ):**

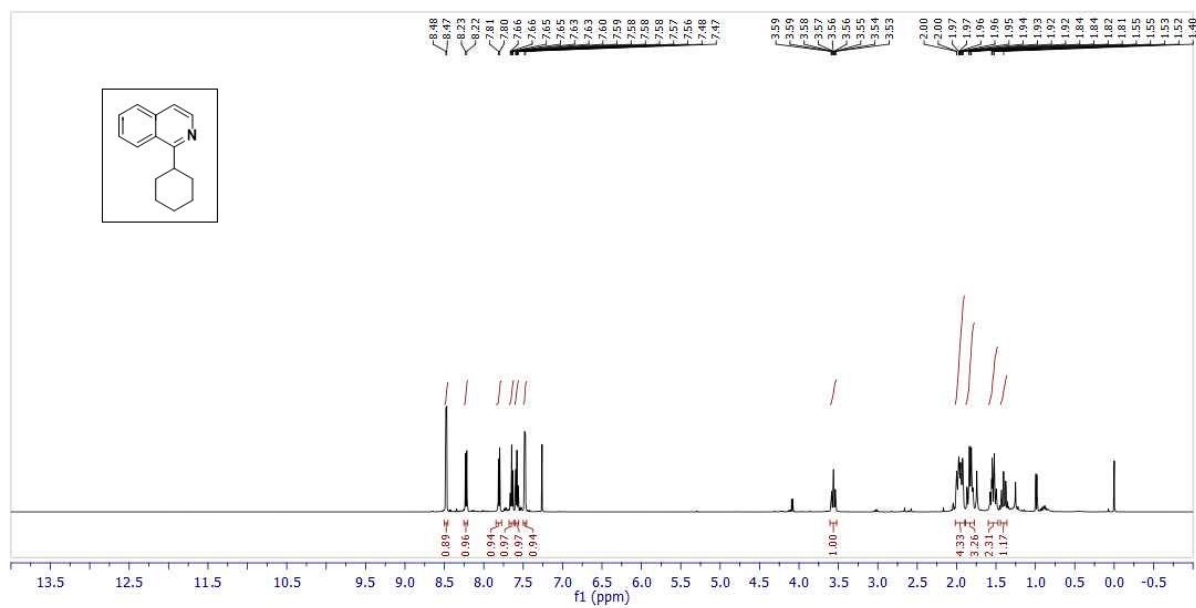

**$^{13}\text{C}$  NMR spectrum of 4m (126 MHz,  $\text{CDCl}_3$ ):**

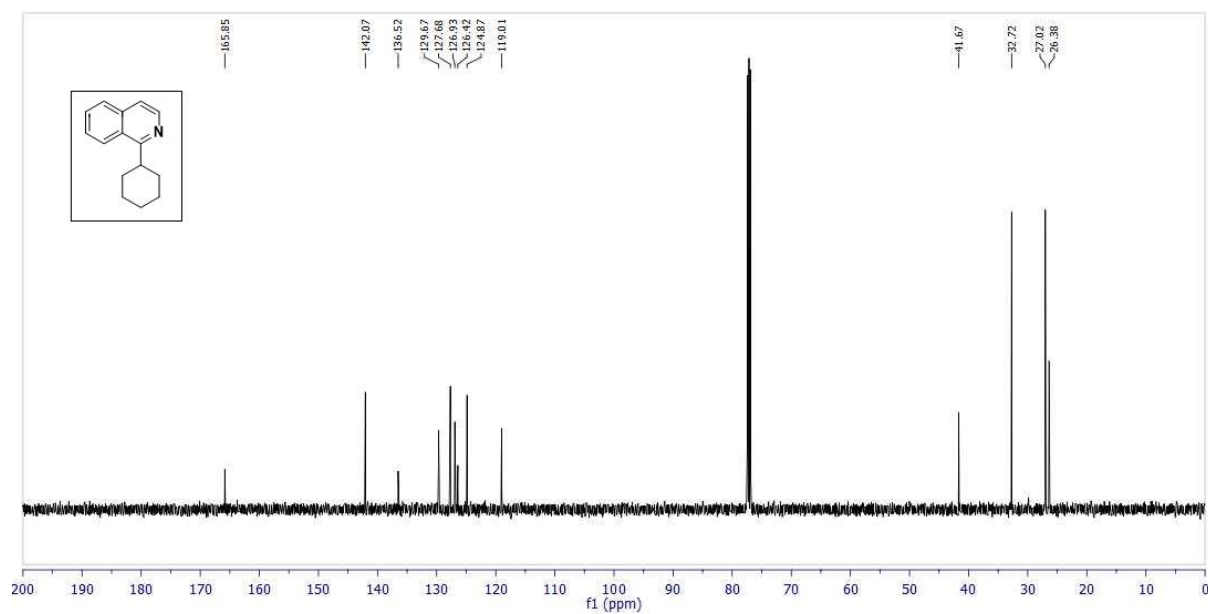

**$^1\text{H}$  NMR spectrum of 4n (500 MHz,  $\text{CDCl}_3$ ):**

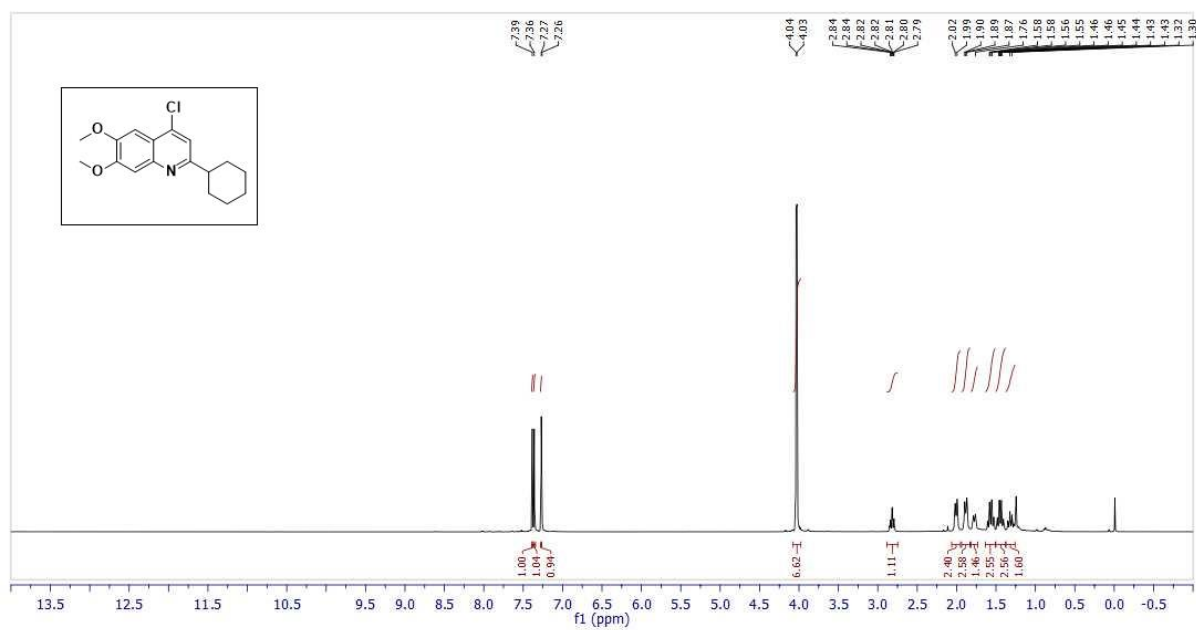

**$^{13}\text{C}$  NMR spectrum of 4n (126 MHz,  $\text{CDCl}_3$ ):**

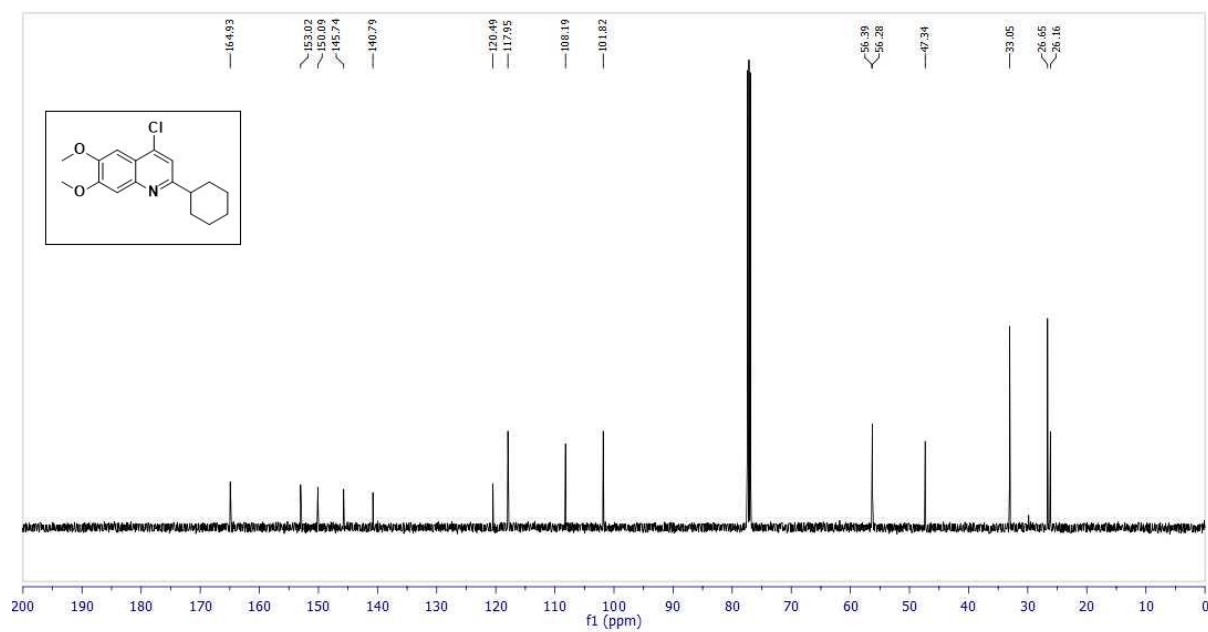

**$^1\text{H}$  NMR spectrum of 4o (500 MHz,  $\text{CDCl}_3$ ):**

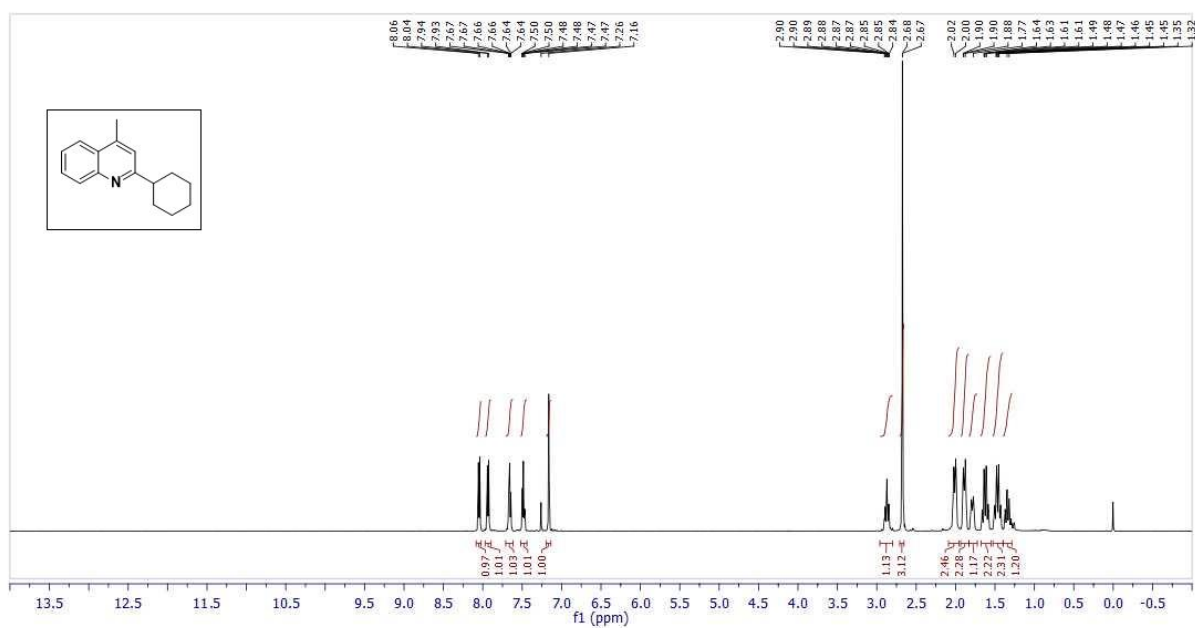

**$^{13}\text{C}$  NMR spectrum of 4o (126 MHz,  $\text{CDCl}_3$ ):**

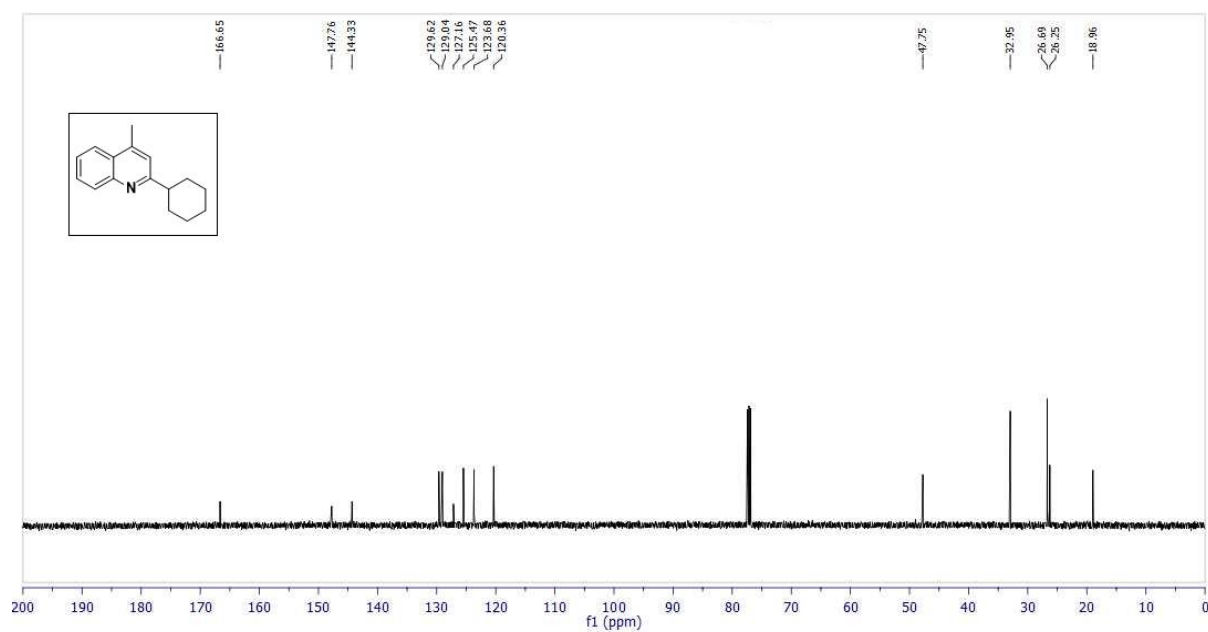

**<sup>1</sup>H NMR spectrum of 4p (500 MHz, CDCl<sub>3</sub>):**

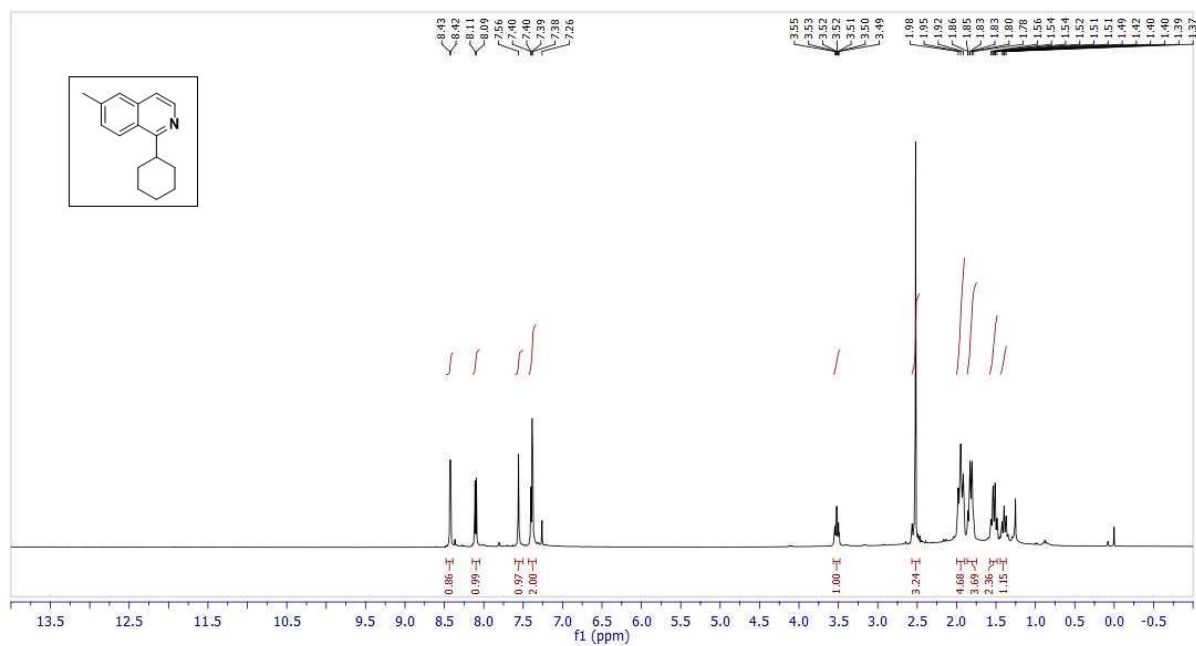

**<sup>13</sup>C NMR spectrum of 4p (126 MHz, CDCl<sub>3</sub>):**

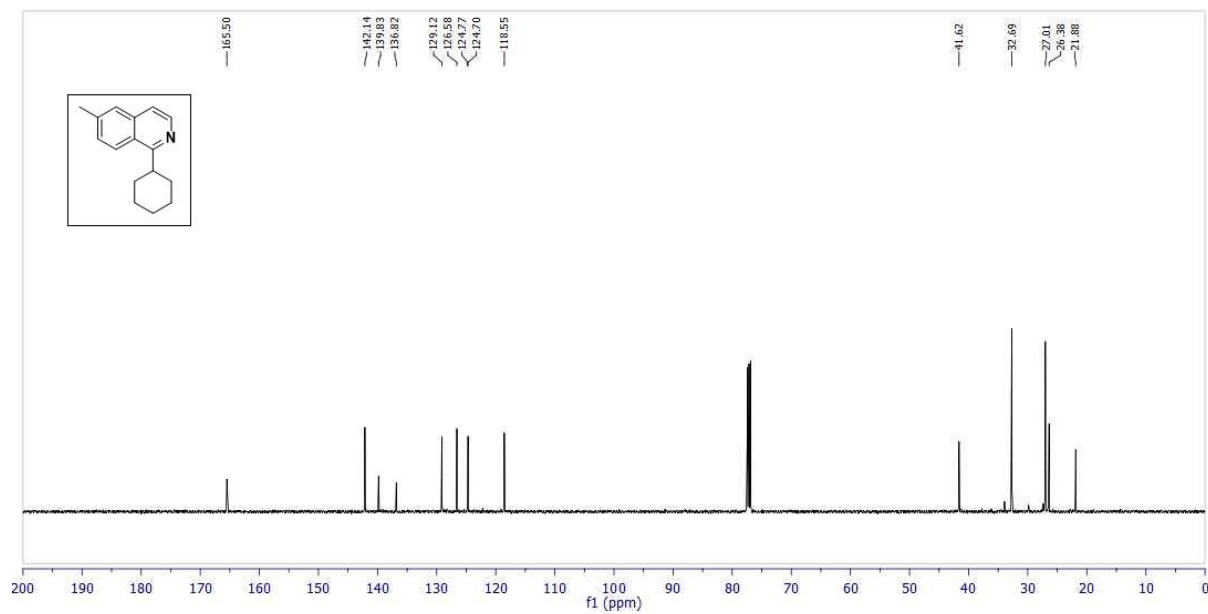

**<sup>1</sup>H NMR spectrum of 4q (500 MHz, CDCl<sub>3</sub>):**

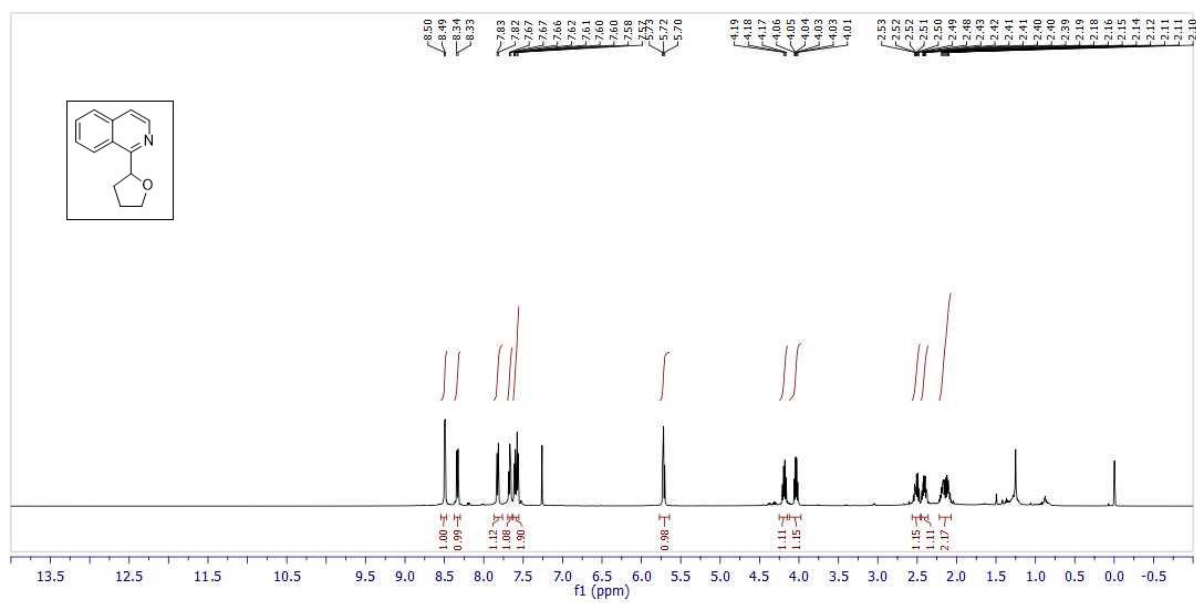

**<sup>13</sup>C NMR spectrum of 4q (126 MHz, CDCl<sub>3</sub>):**

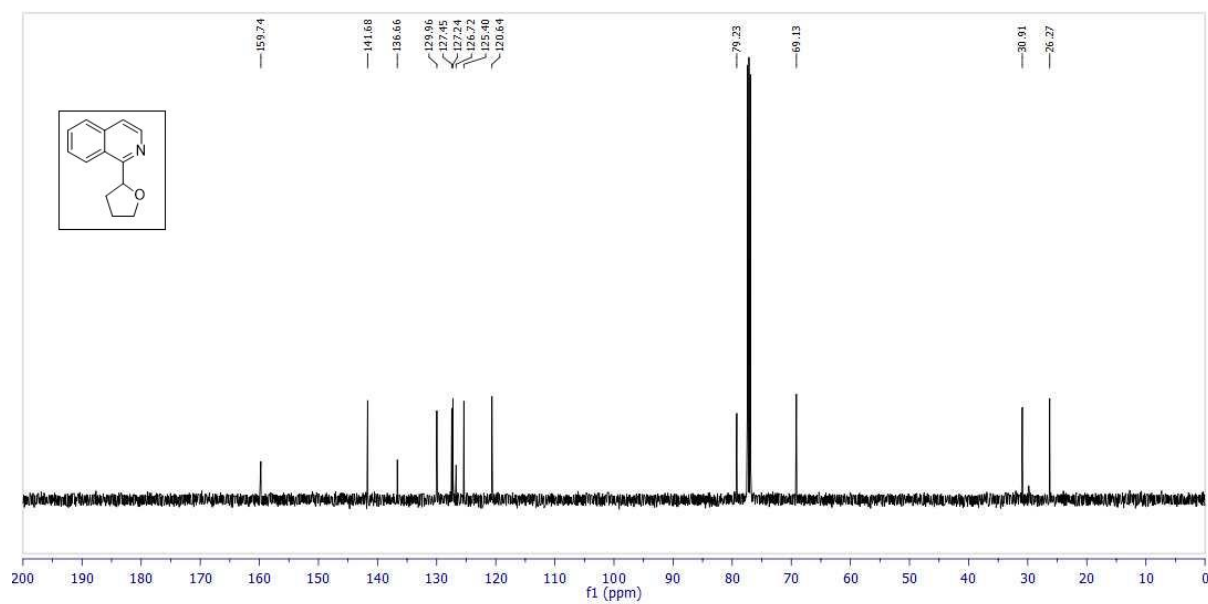

**<sup>1</sup>H NMR spectrum of 4r (500 MHz, CDCl<sub>3</sub>):**

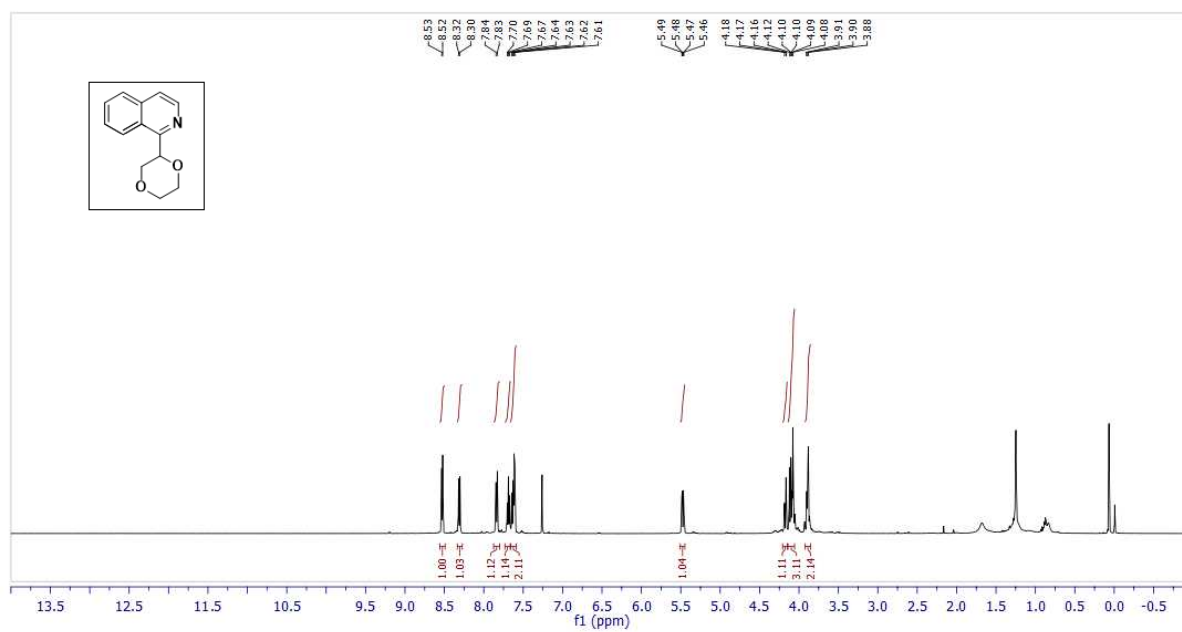

**<sup>13</sup>C NMR spectrum of 4r (101 MHz, CDCl<sub>3</sub>):**

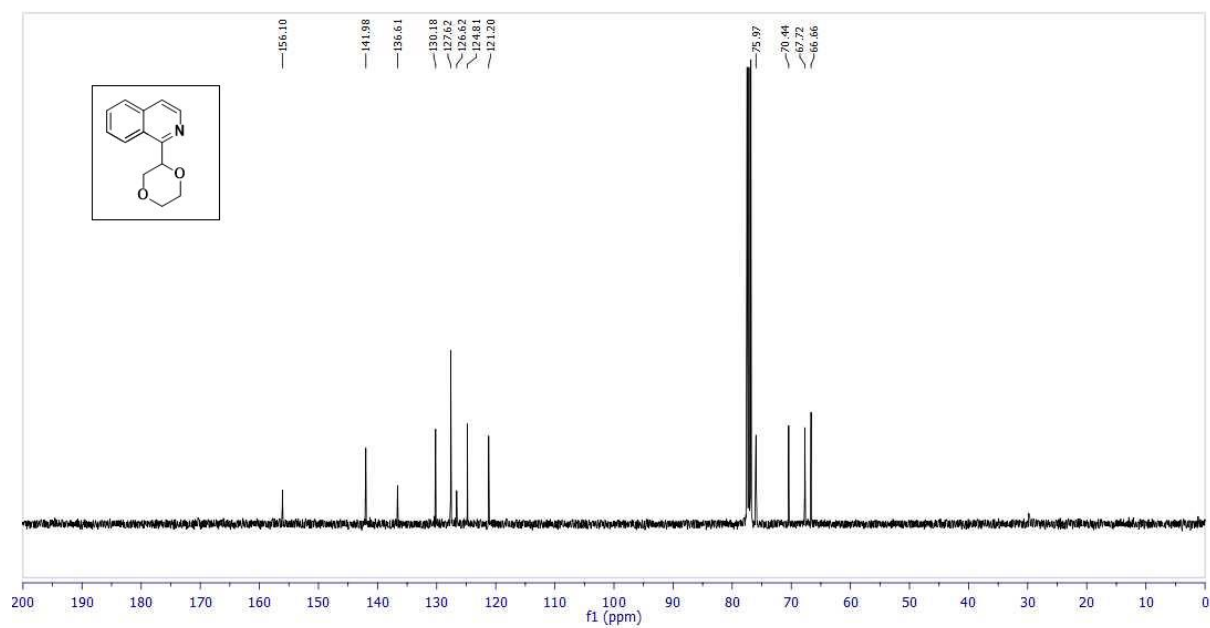

**<sup>1</sup>H NMR spectrum of 4s (500 MHz, CDCl<sub>3</sub>):**

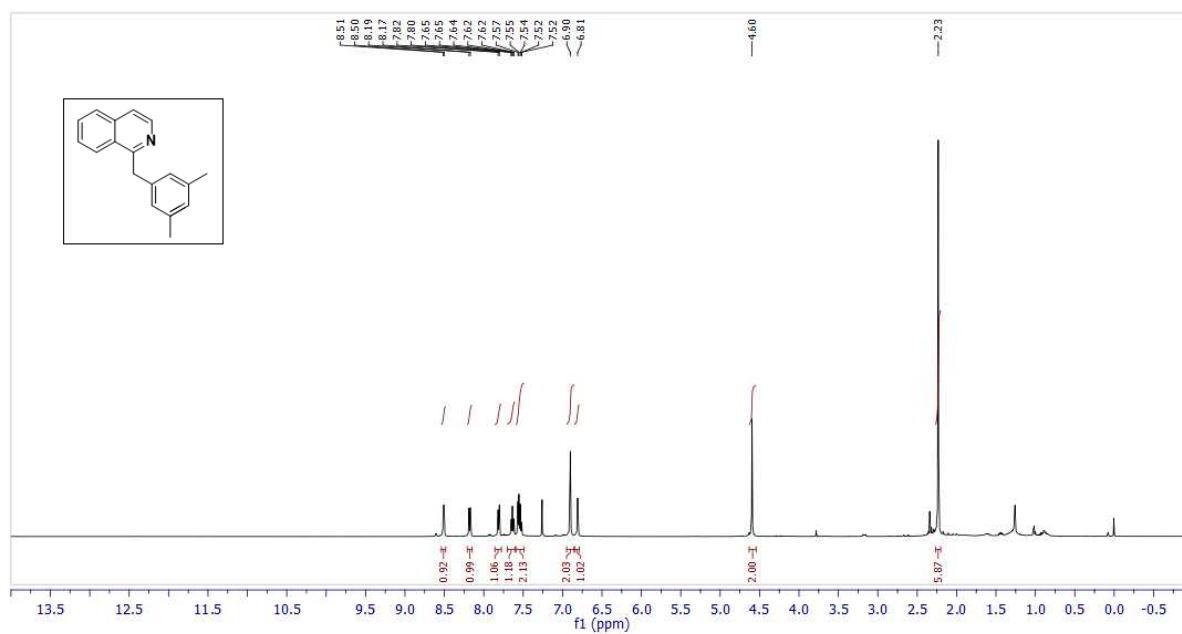

**$^{13}\text{C}$  NMR spectrum of 4s (126 MHz,  $\text{CDCl}_3$ ):**

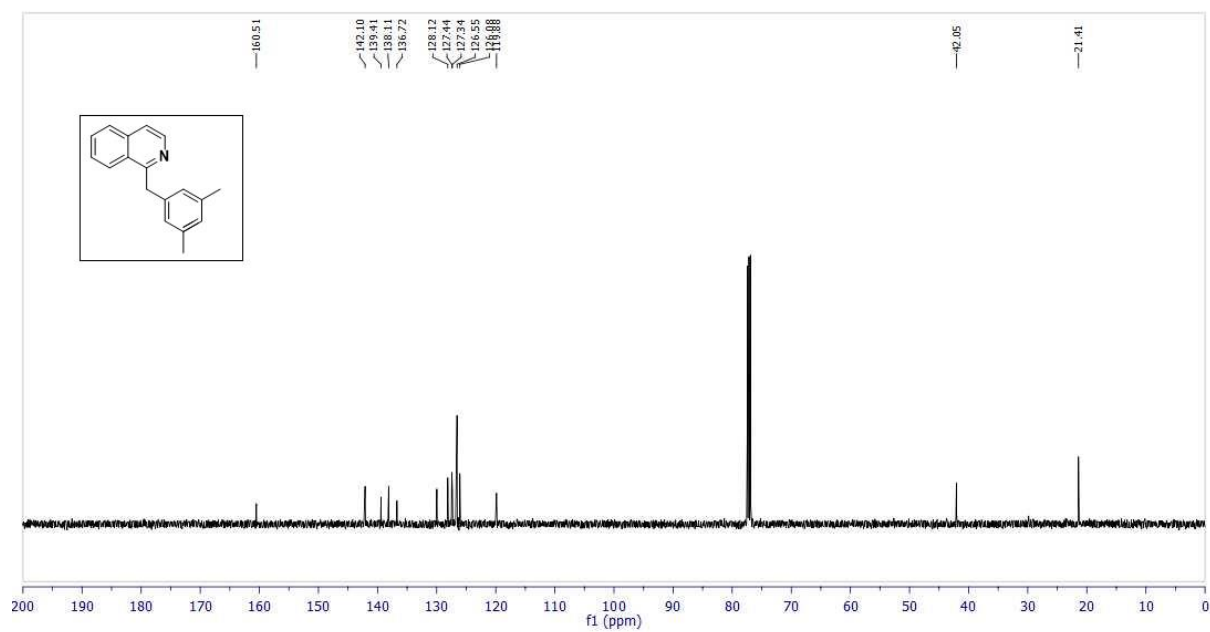

**<sup>1</sup>H NMR spectrum of 4t (500 MHz, CDCl<sub>3</sub>):**

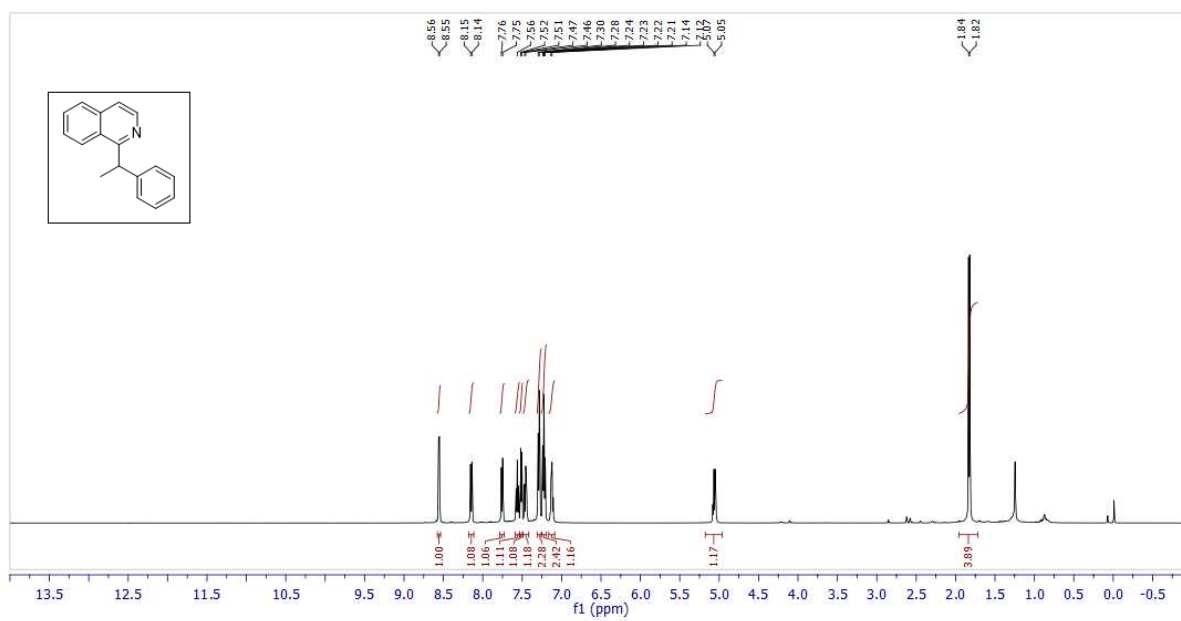

**<sup>13</sup>C NMR spectrum of 4t (101 MHz, CDCl<sub>3</sub>):**

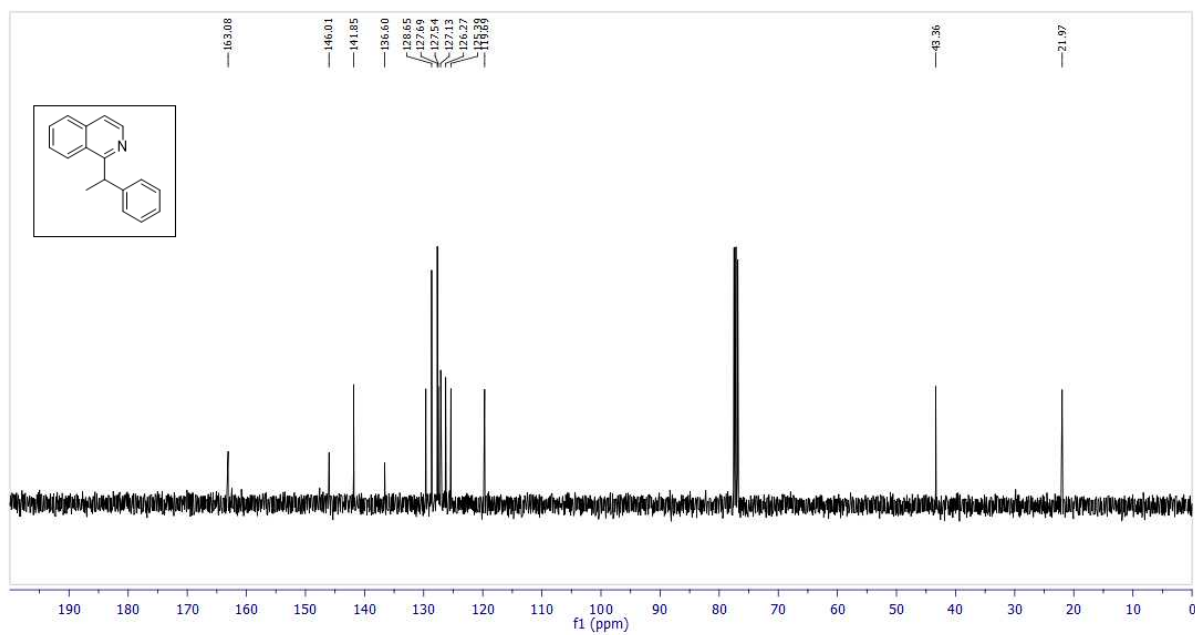

**<sup>1</sup>H NMR spectrum of 7 (500 MHz, DMSO-d<sub>6</sub>):**

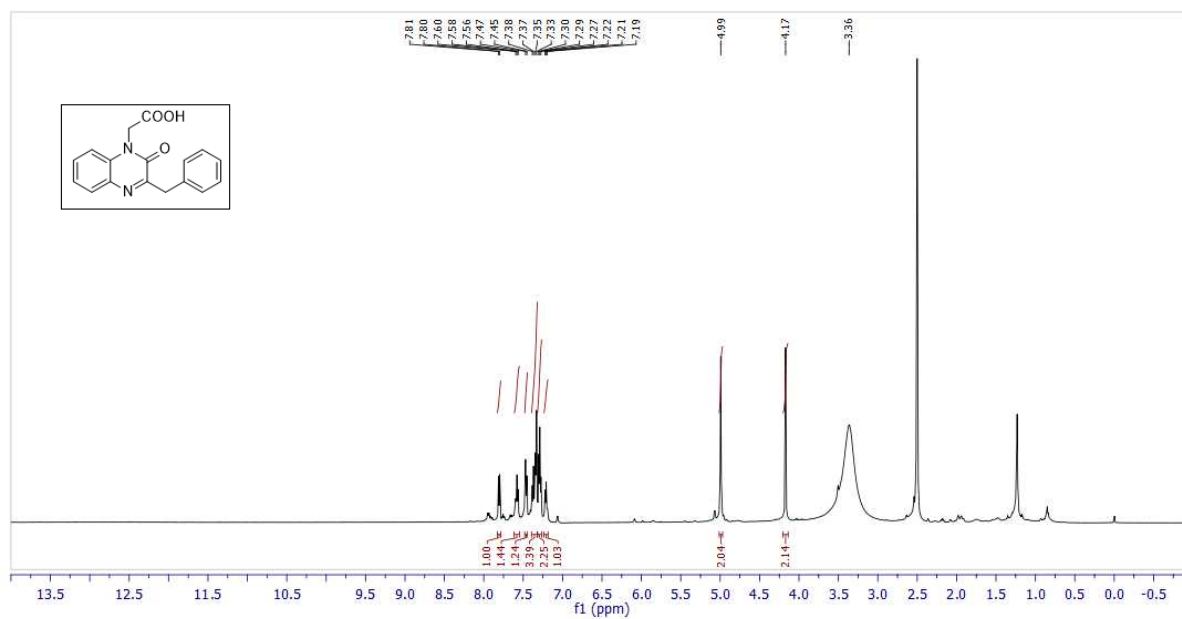

**<sup>13</sup>C NMR spectrum of 7 (101 MHz, DMSO-d<sub>6</sub>):**

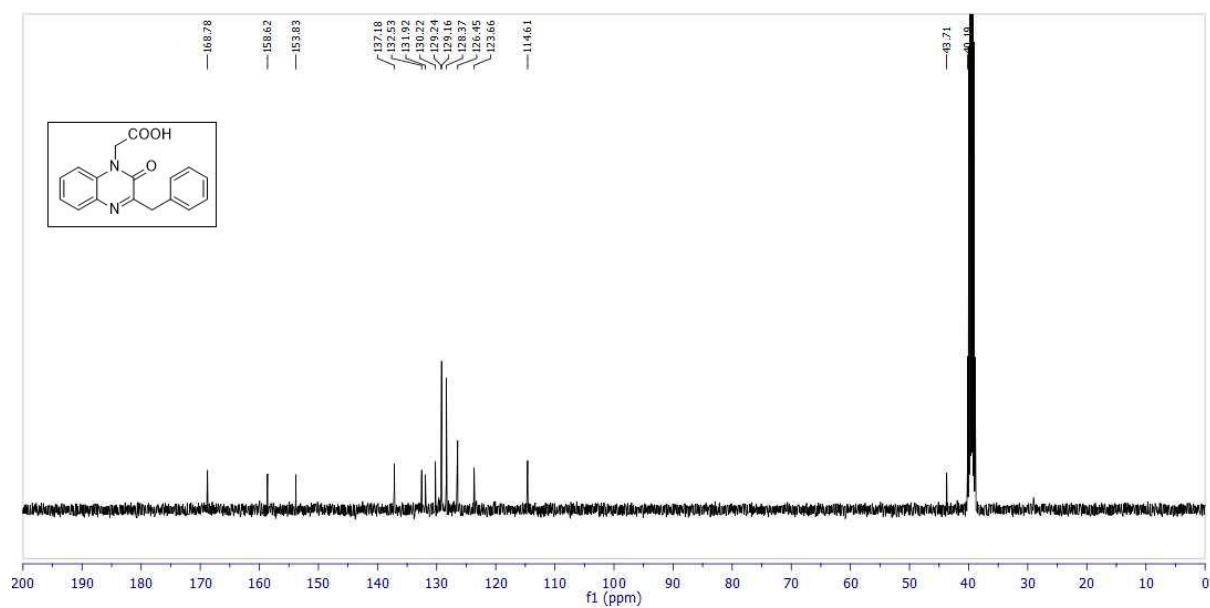

**<sup>1</sup>H NMR spectrum of 8 (500 MHz, CDCl<sub>3</sub>):**

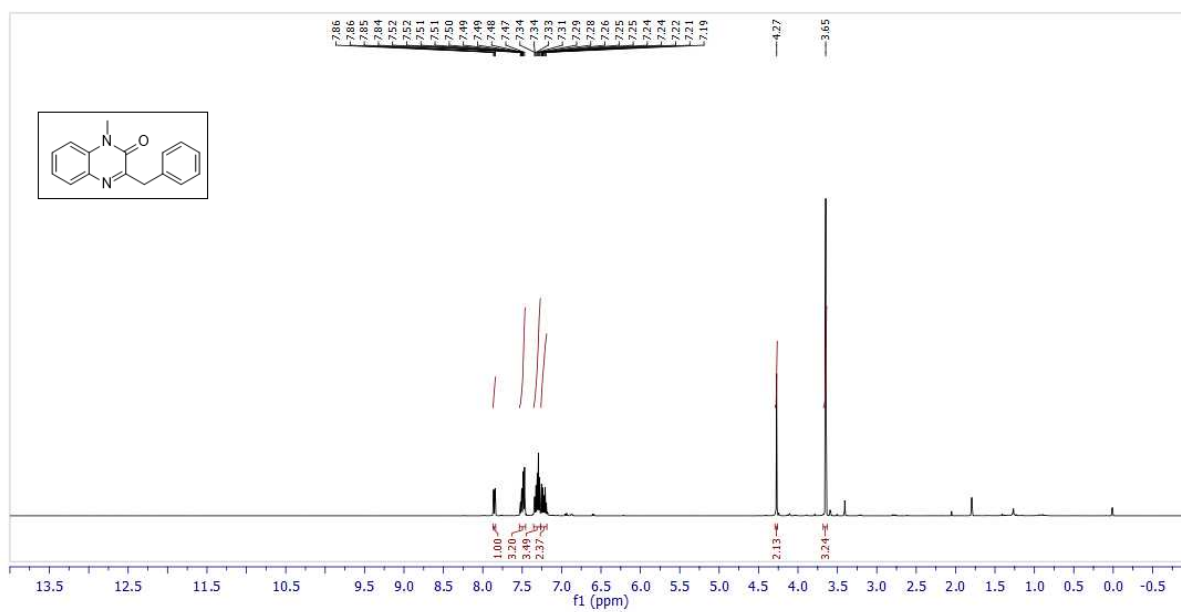

**<sup>13</sup>C NMR spectrum of 8 (126 MHz, CDCl<sub>3</sub>):**

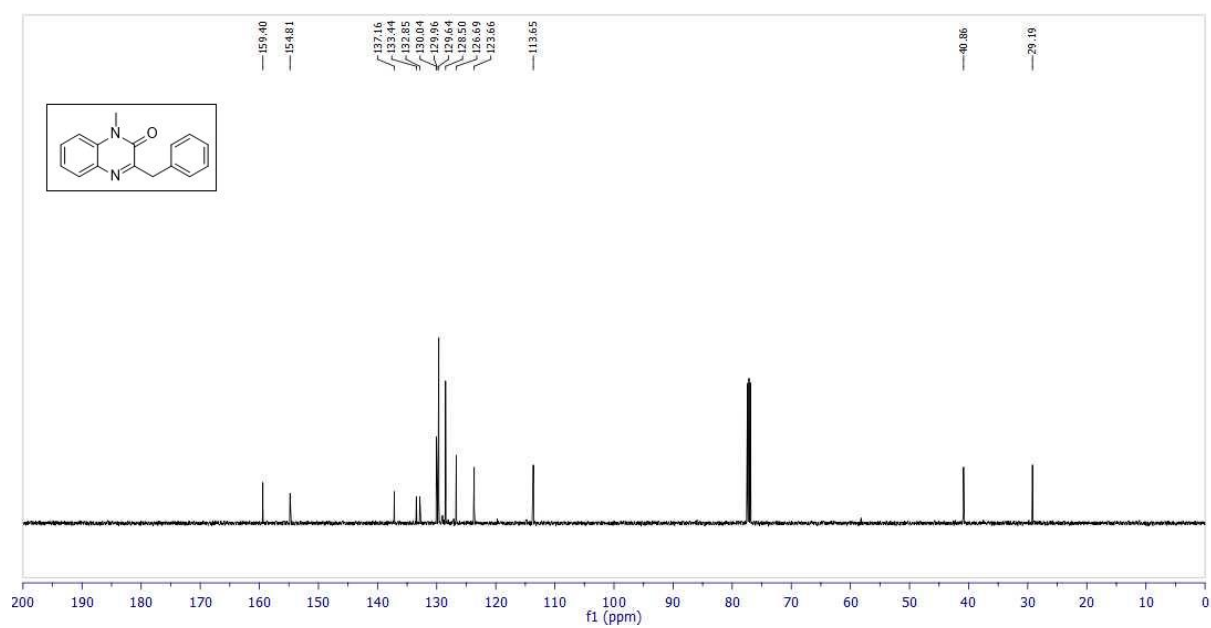

Supplement: d1ob00665g1.pdf [file d1ob00665g1.pdf]
